# Supplementary material
Source: Research Square preprint supplement (doi:10.21203/rs.3.rs-9575873/v1)
Supplement: Supplementary file 1 [file 5ffe996f3ccbdb4795eea1ff.docx]

Supporting Information

**2D MoS2-Conformal 3D-Printed Platform for Dual Phototherapy and Bone Regeneration**

Jong Hwa Seo1,**†**, In ho Choi2,3,4**†**, Hyun Lee5, Seojoon Bang1, Hyeong Seok Kang1, Chan Ho Moon1, Ju Yeong Gwon6, Nayoung Lee1, Geonwoo Kim1, Youn Ha Cho2,3,4, Se Jin Choi2,3,4, Hyo Jin Joo2,3,4, Ji Hye Kim2,3,4, Eun Saem Song2,3,4, Jihoon Kim7,8, Dongjun Kim7,8, Sungsu Kang9,Dong Yun Lee6, Donghyun Lim6, Kisuk Yang10, Gi Doo Cha11, Soo-Hong Lee12, Jungwon Park7,8, Min-Ho Kang2,3,4*, Hyun-Do Jung1*

J. H. Seo, S. Bang, H. S. Kang, C. H. Moon, N. L, G. K, H.-D. Jung

1Division of Materials Science and Engineering, Hanyang University, Seoul 04763, Republic of Korea

E-mail: hdjung@hanyang.ac.kr, Hyun-Do Jung

I. H. Choi, Y. H. Cho, S. J. Choi, H. J. Joo, J. H. Kim, E. S. Song, M.-H. Kang

2Department of Biotechnology, The Catholic University of Korea, Bucheon 14662, Republic of Korea

3Department of Biomedical-Chemical Engineering, The Catholic University of Korea, Bucheon 14662, Gyeonggi-do, Republic of Korea

4Research Institute for Controlled Biomaterials of Regulated Cell Death, The Catholic University of Korea, Bucheon 14662, Republic of Korea

E-mail: mhkang@catholic.ac.kr, Min-Ho Kang

H. Lee

5Research Institute of Intelligent Manufacturing & Materials Technology, Korea Institute of Industrial Technology, 156, Gaetbeol-ro, Yeonsu-gu, Incheon 21999, Republic of Korea

J. Y. Gwon, D. Y. Lee, D. H. Lim

6Department of Bioengineering, Hanyang University, Seoul 04763, Republic of Korea

J. H. Kim, D. J. Kim, J.W. Park

7Department of Chemical and Biological Engineering, Institute of Chemical Process, Seoul National University, Seoul, 08826, Republic of Korea

8Center for Nanoparticle Research, Institute for Basic Science (IBS), Seoul National University, Seoul, 08826, Republic of Korea

S. S. Kang

9 Department of Chemistry, University of Chicago, Chicago, Illinois 60637, United State

K. S. Yang

10Division of Bioengineering, College of Life Sciences and Bioengineering, Incheon National University, Incheon 22012, Republic of Korea

G. D. Cha

11Department of Systems Biotechnology, Chung-Ang University, Anseong-si, Gyeonggi-do, 17546, Republic of Korea

S.-H. Lee

12Department of Biomedical Engineering, Dongguk University, Seoul 04620, Republic of Korea

†These authors contributed equally to this work.

*These authors are co-corresponding authors.


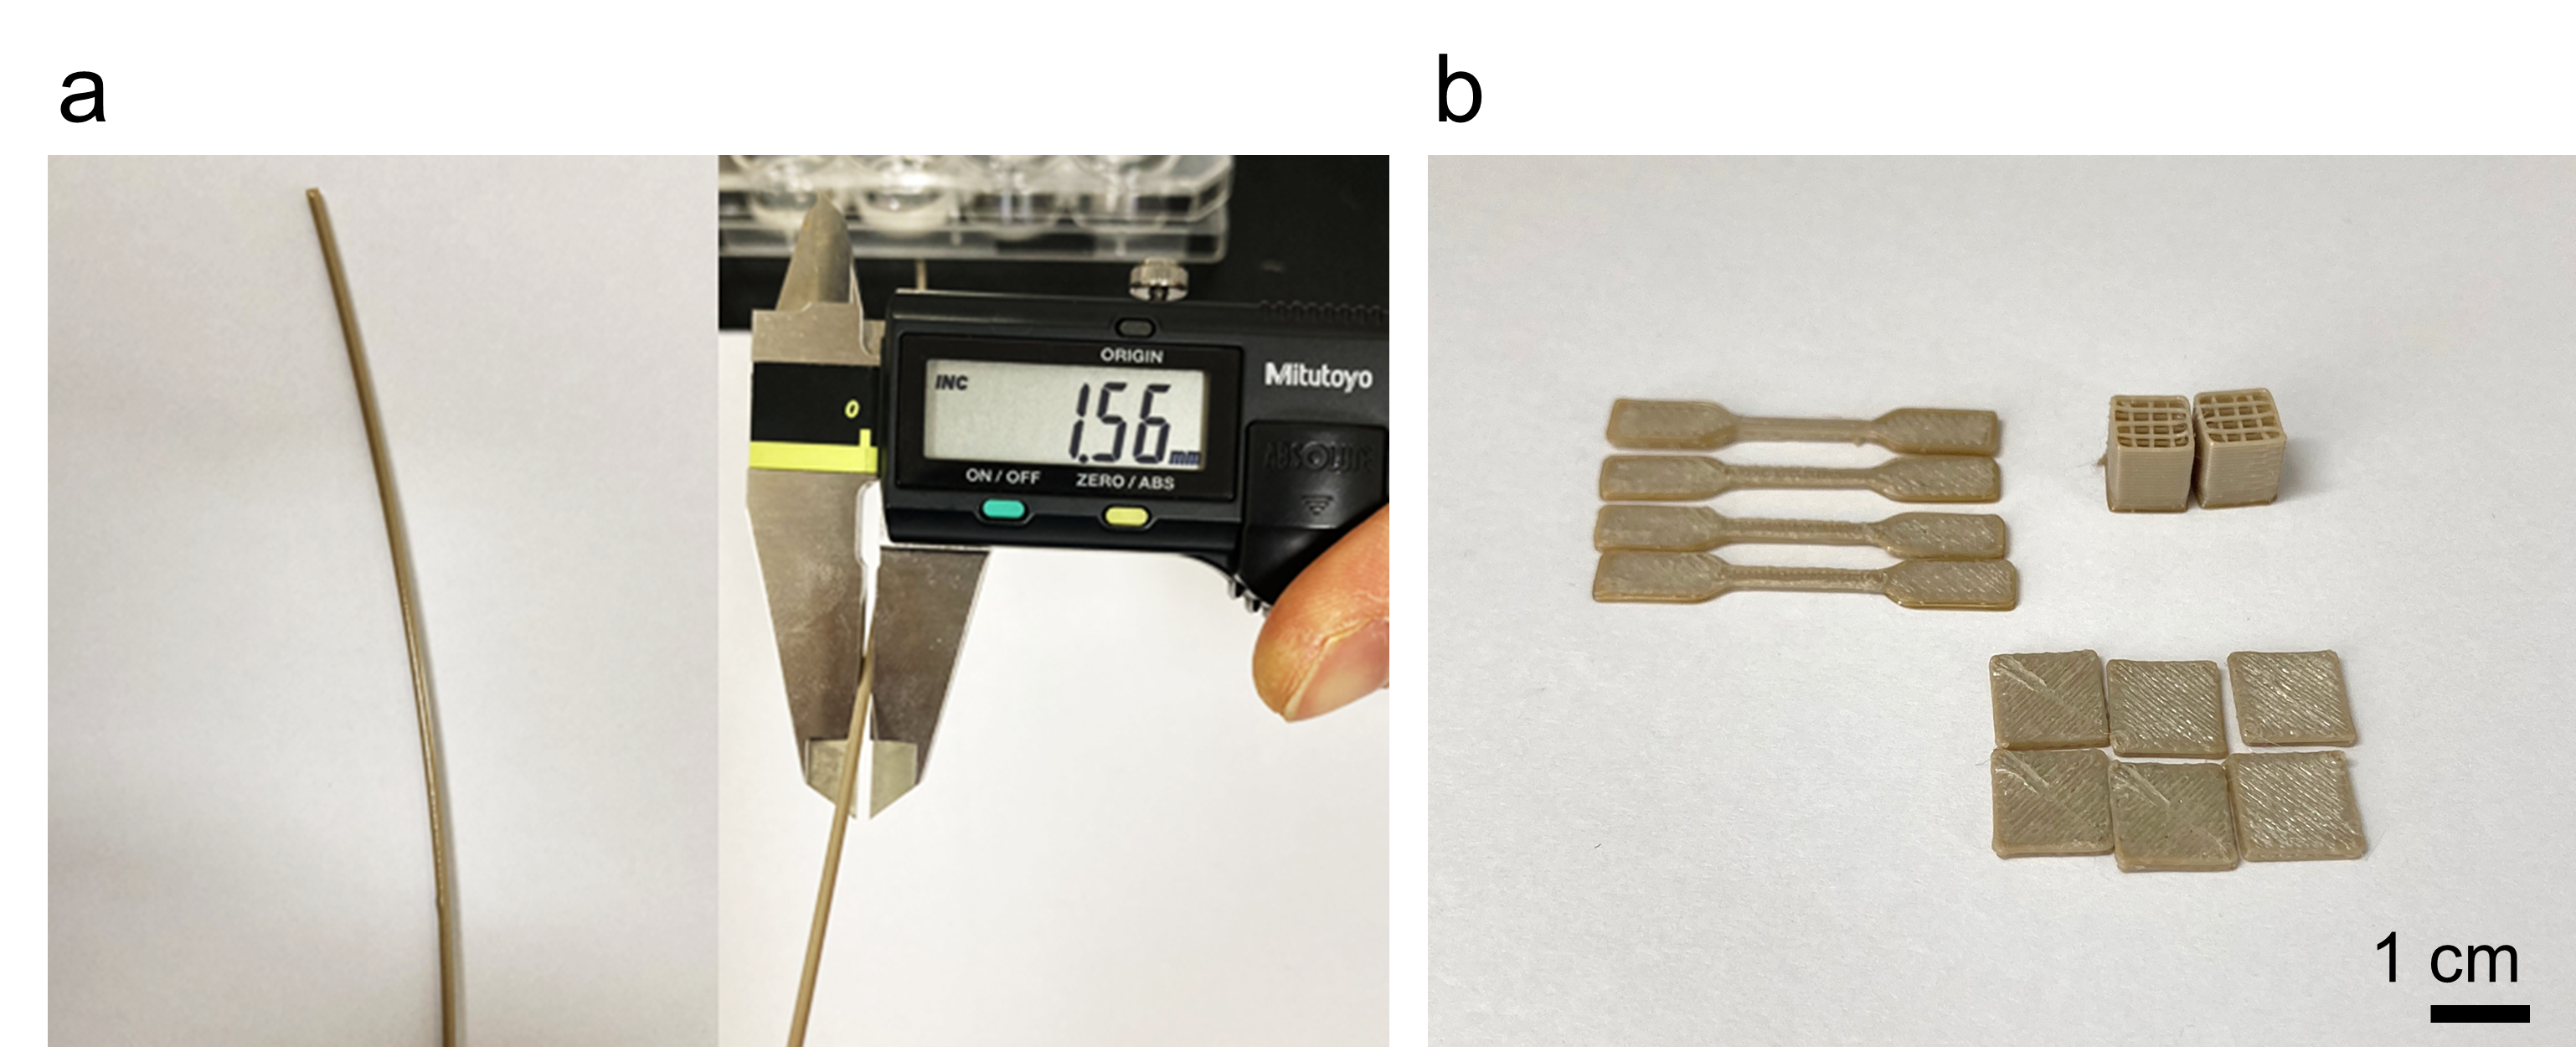


**Fig. S1. Fabrication and structural versatility of PEEK filament and 3D-printed PEEK constructs.** Optical images of (a) fabricated PEEK filament and (b) architecturally diverse PEEK constructs fabricated via FDM-based 3D printing.


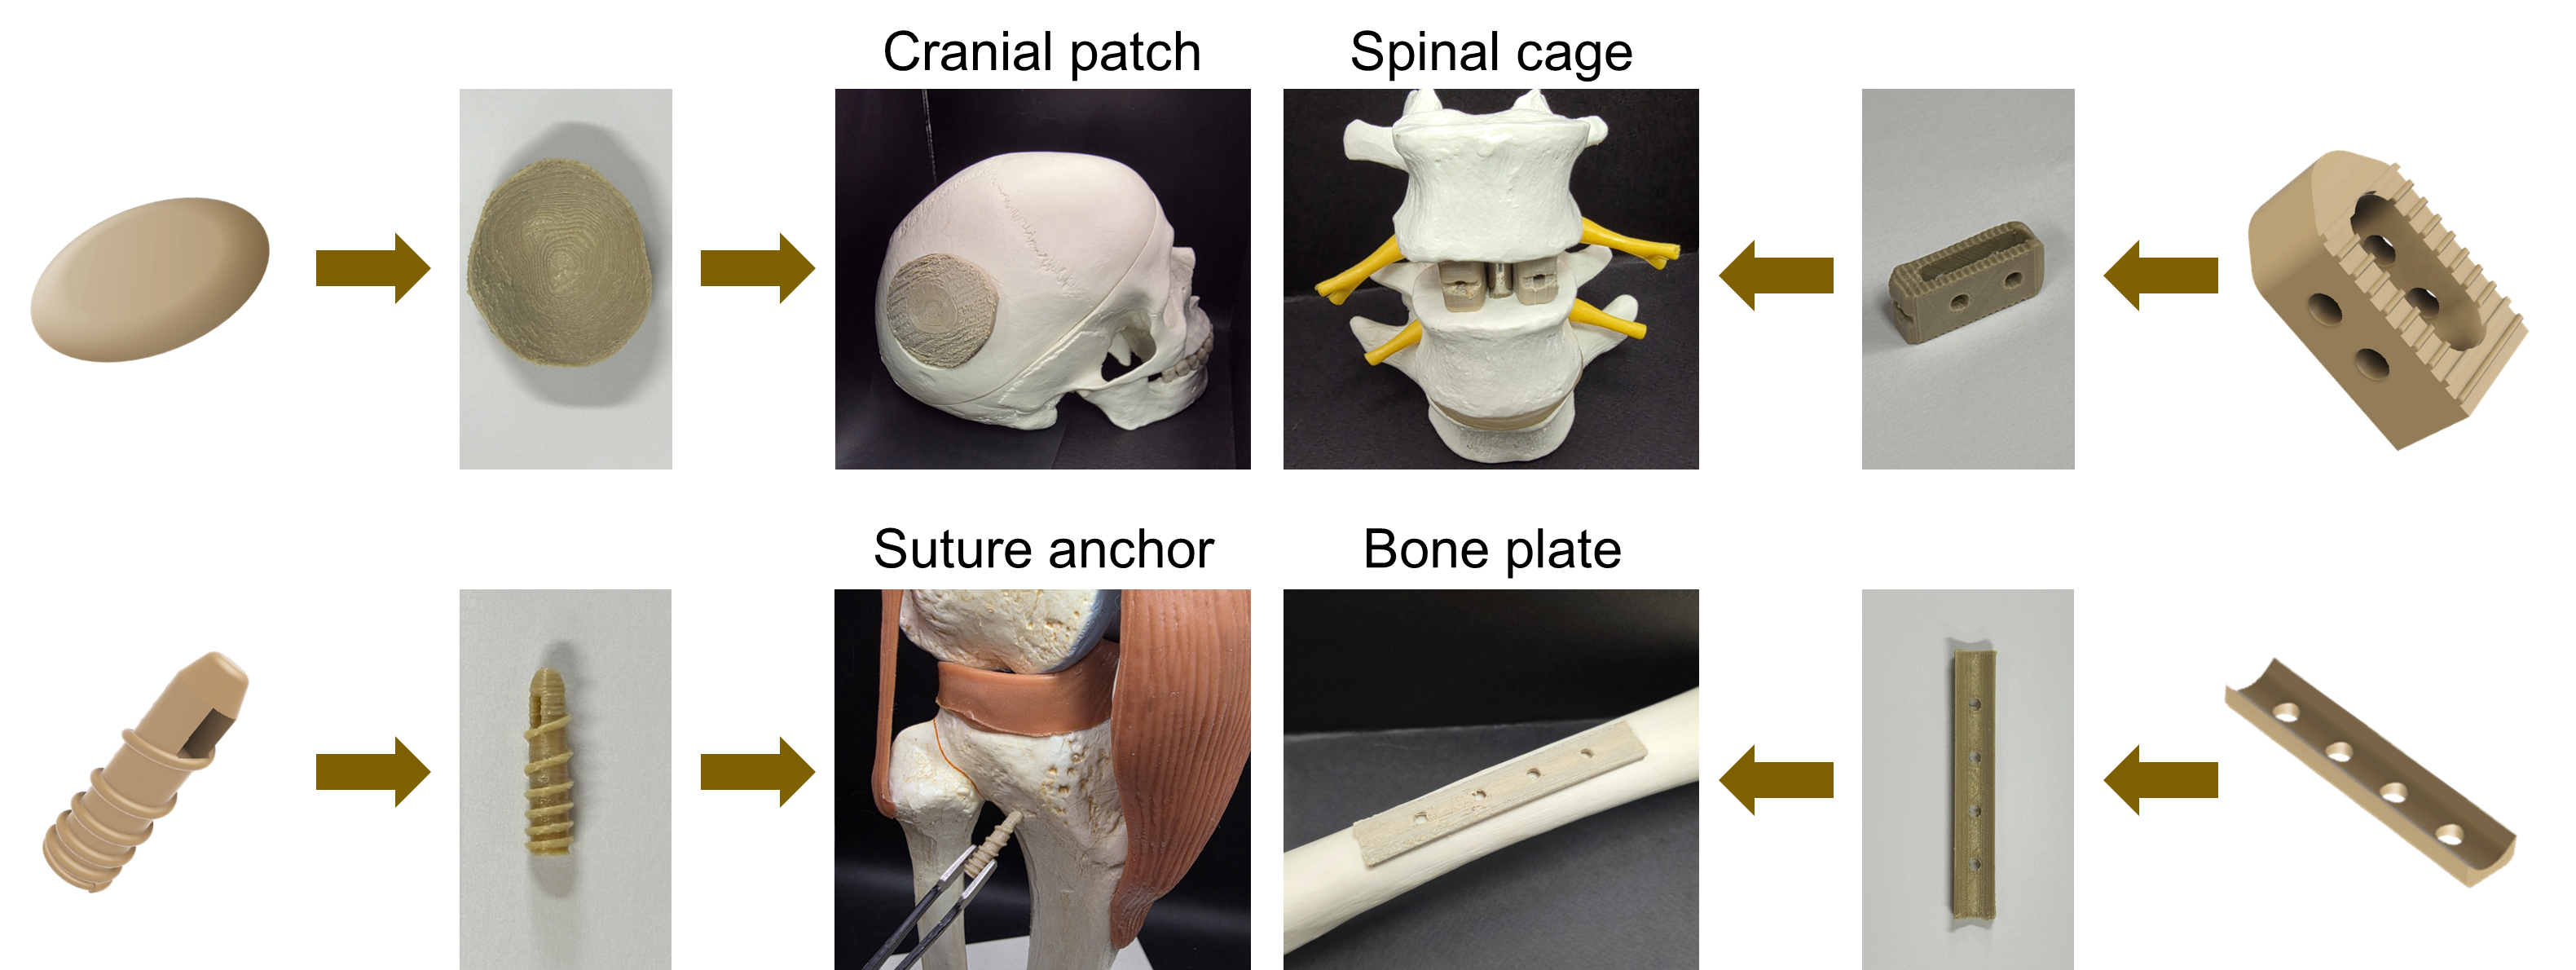


**Fig. S2. Design versatility and anatomical applicability of 3D-printed PEEK implants.** Representative CAD designs, corresponding fabricated PEEK constructs, and simulated implantation into anatomical bone models, including cranial patch, suture anchor, spinal cage, suture anchor, and bone plate.

**
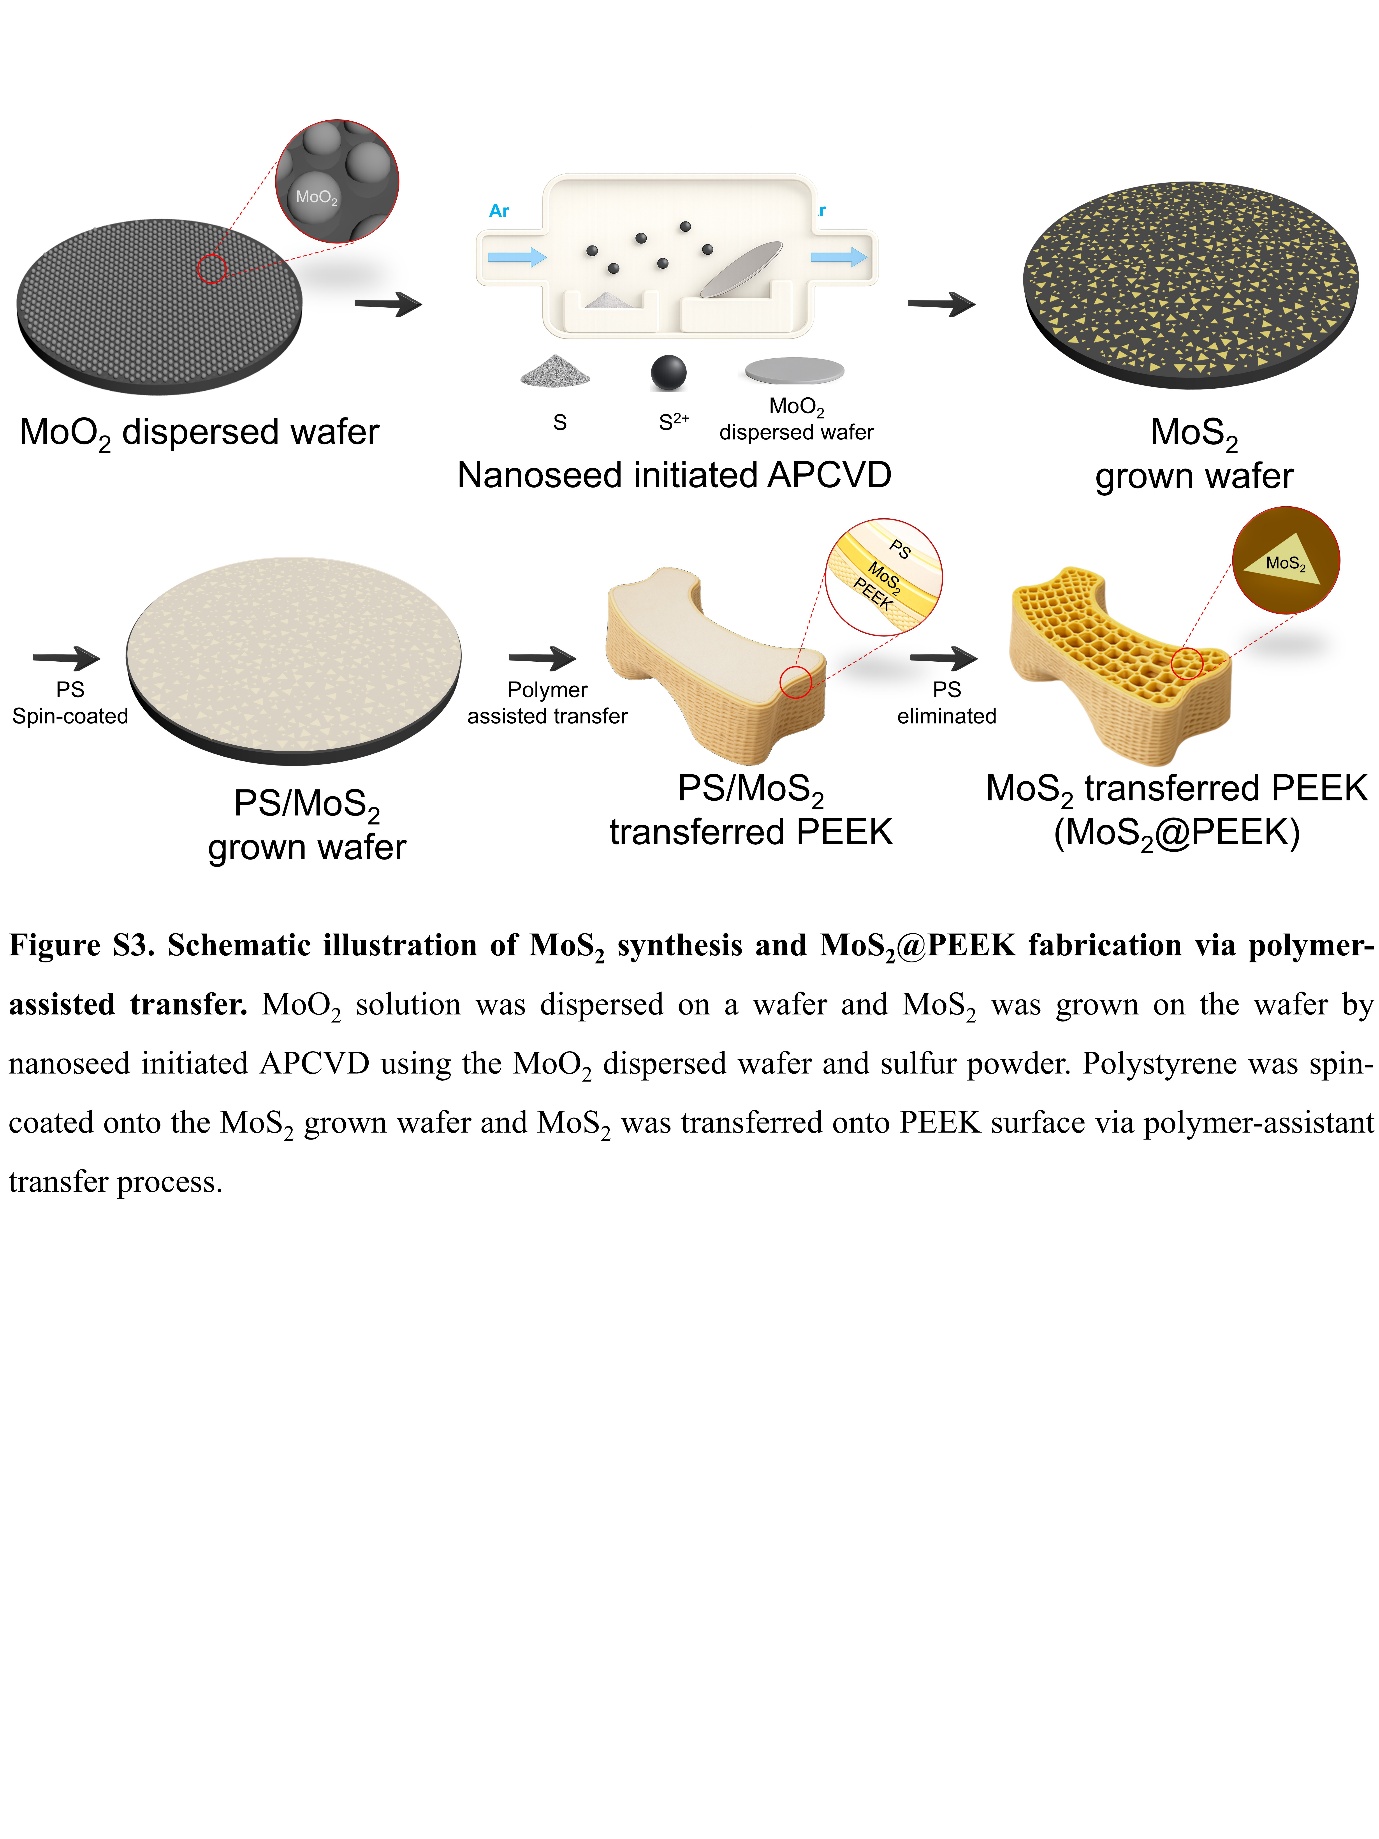
**

**Fig. S3. Schematic illustration of MoS2 synthesis and MoS2@PEEK fabrication via polymer-assisted transfer.** MoO2 solution was dispersed on a wafer and MoS2 was grown on the wafer by nanoseed-initiated APCVD using the MoO2 dispersed wafer and sulfur powder. Polystyrene was spin-coated onto the MoS2 grown wafer and MoS2 was transferred onto PEEK surface via polymer-assistant transfer process.

.


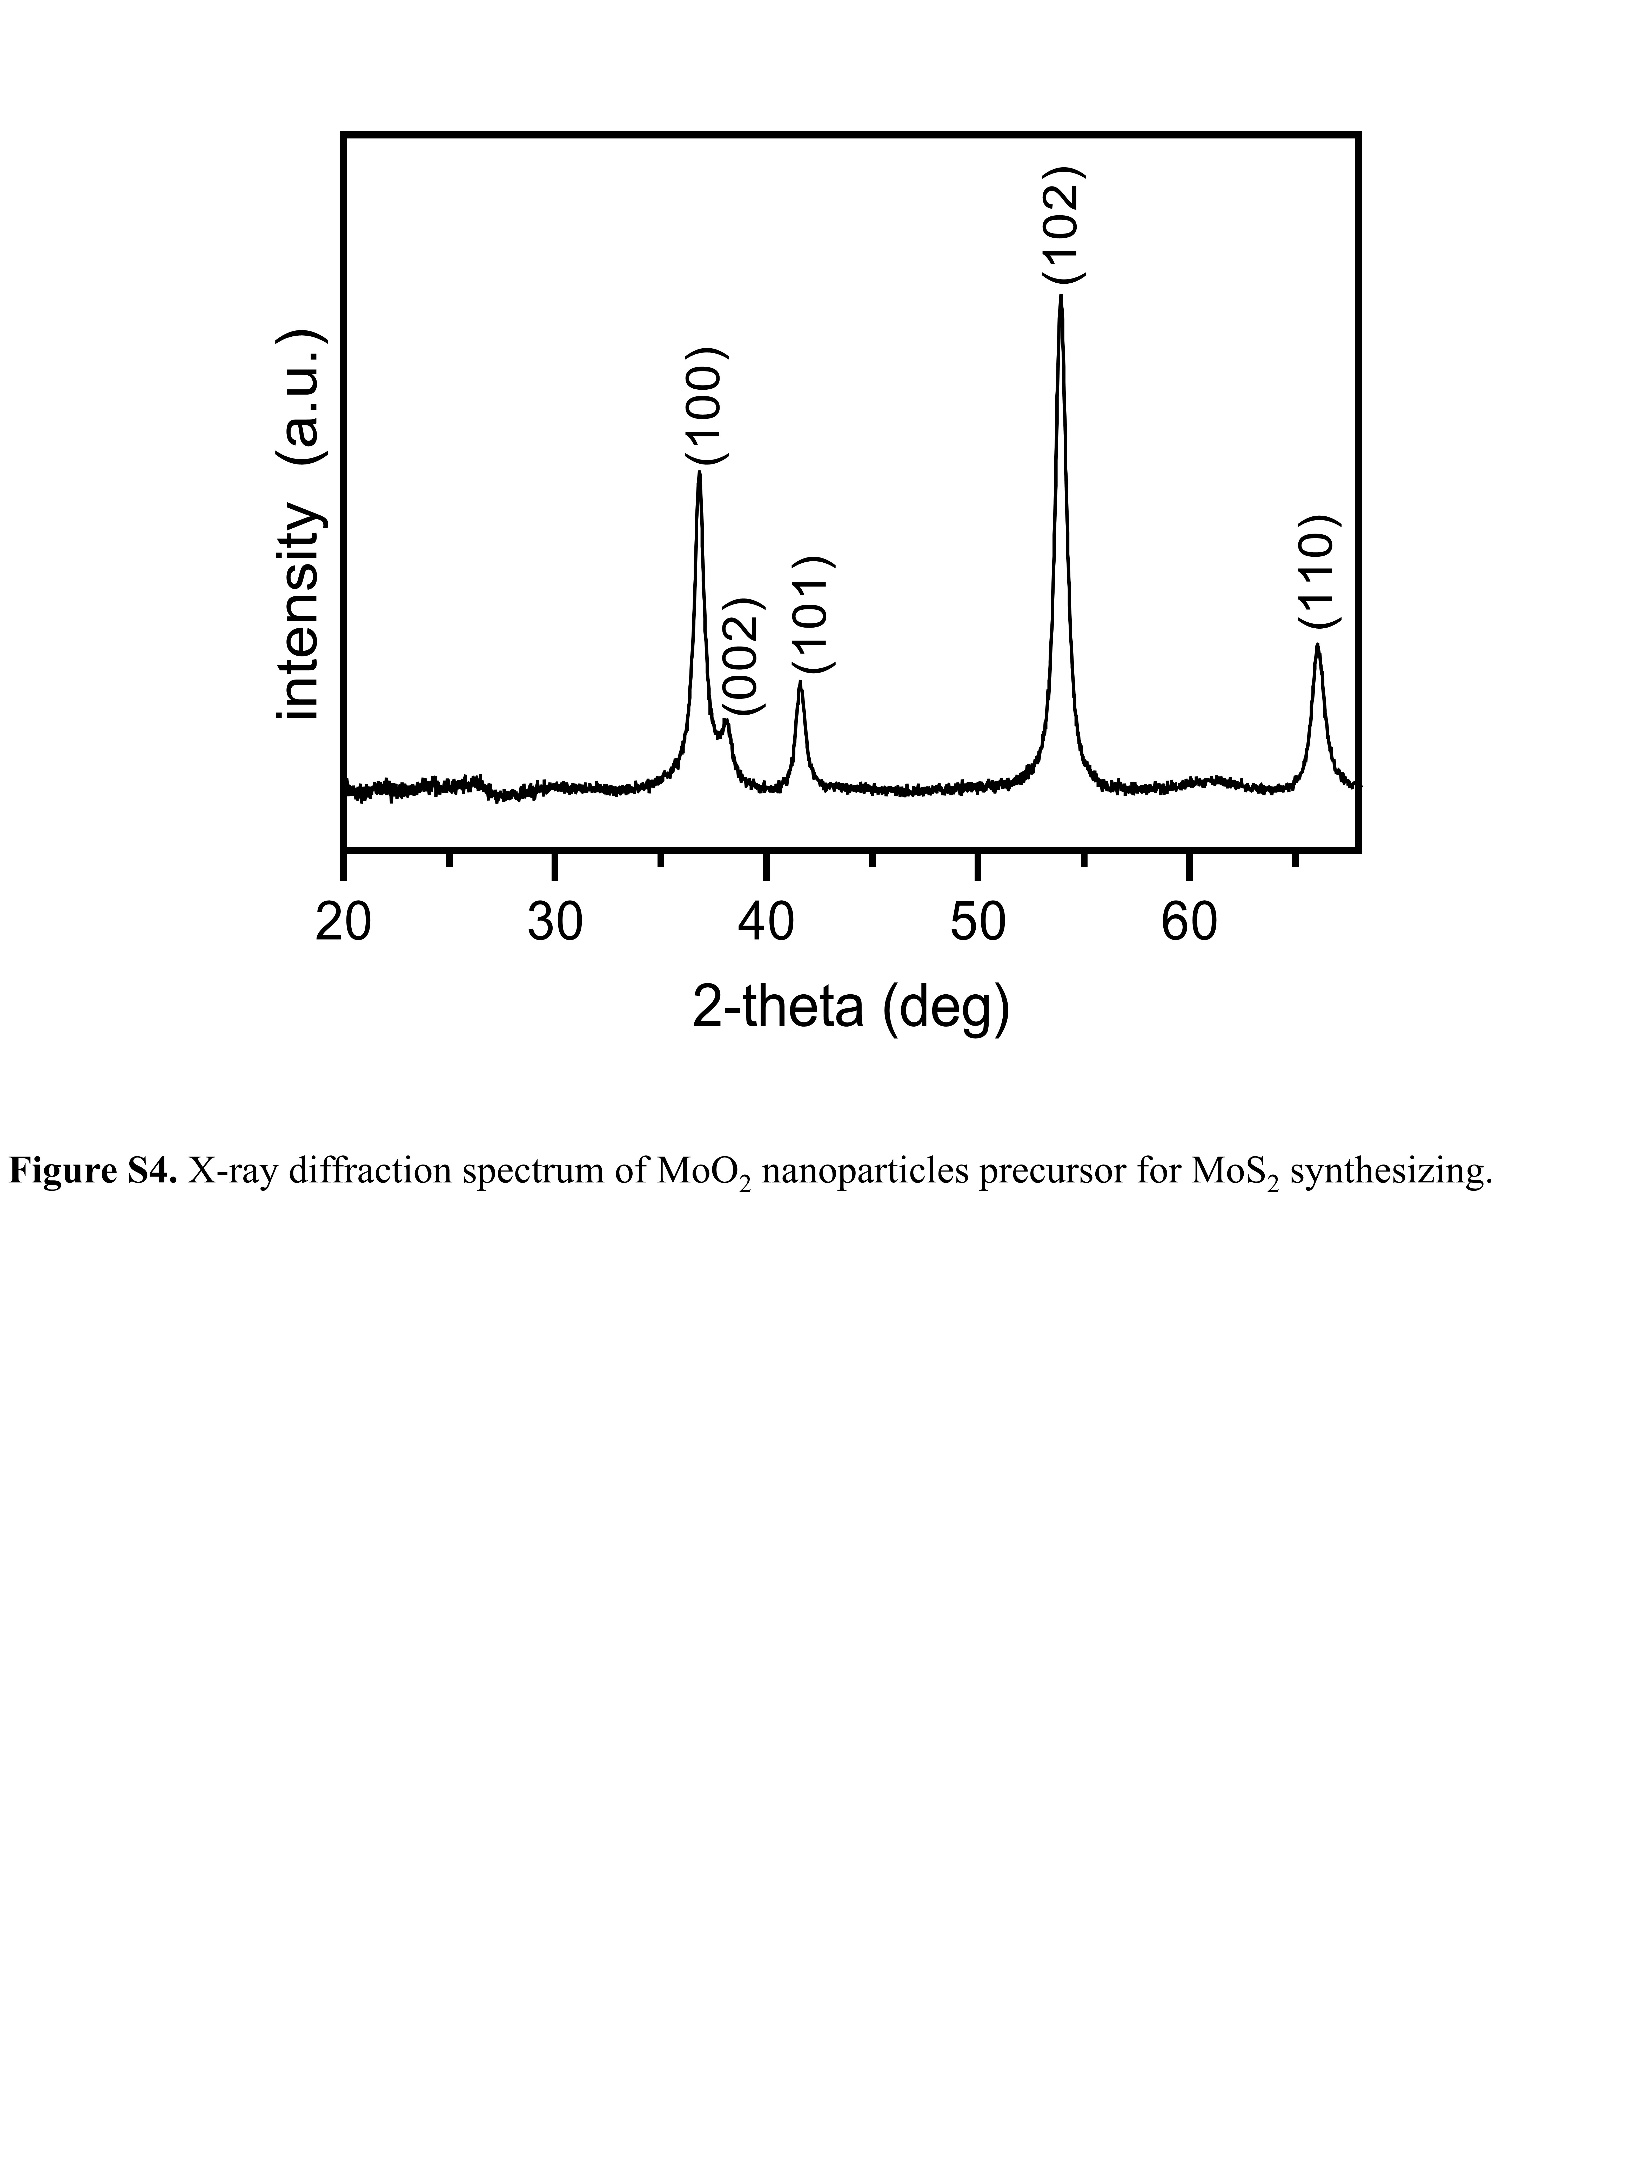


**Fig. S4.** X-ray diffraction spectrum of MoO2 nanoparticles precursor for MoS2 synthesis.


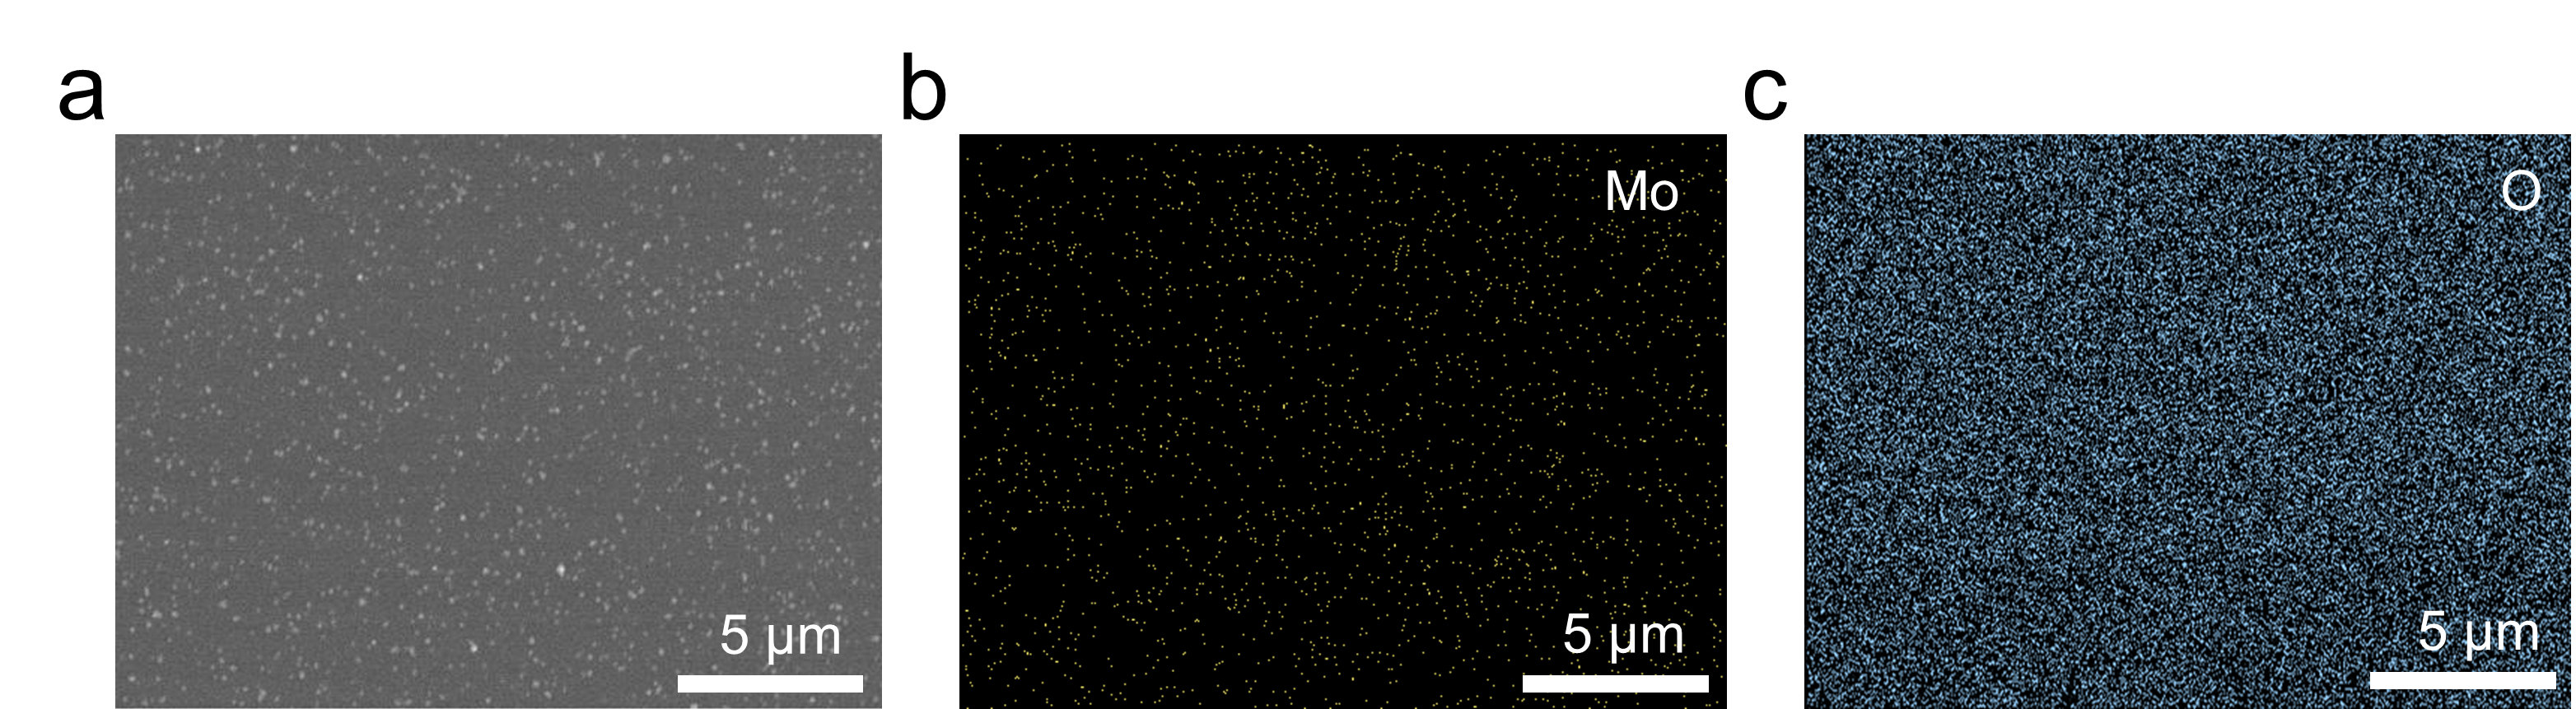


**Fig. S5. Surface SEM and EDX analysis of MoO2 dispersed wafer.** (a) SEM image and EDX elemental maps of (b) Mo and (c) O on the surface of MoO2 dispersed wafer.


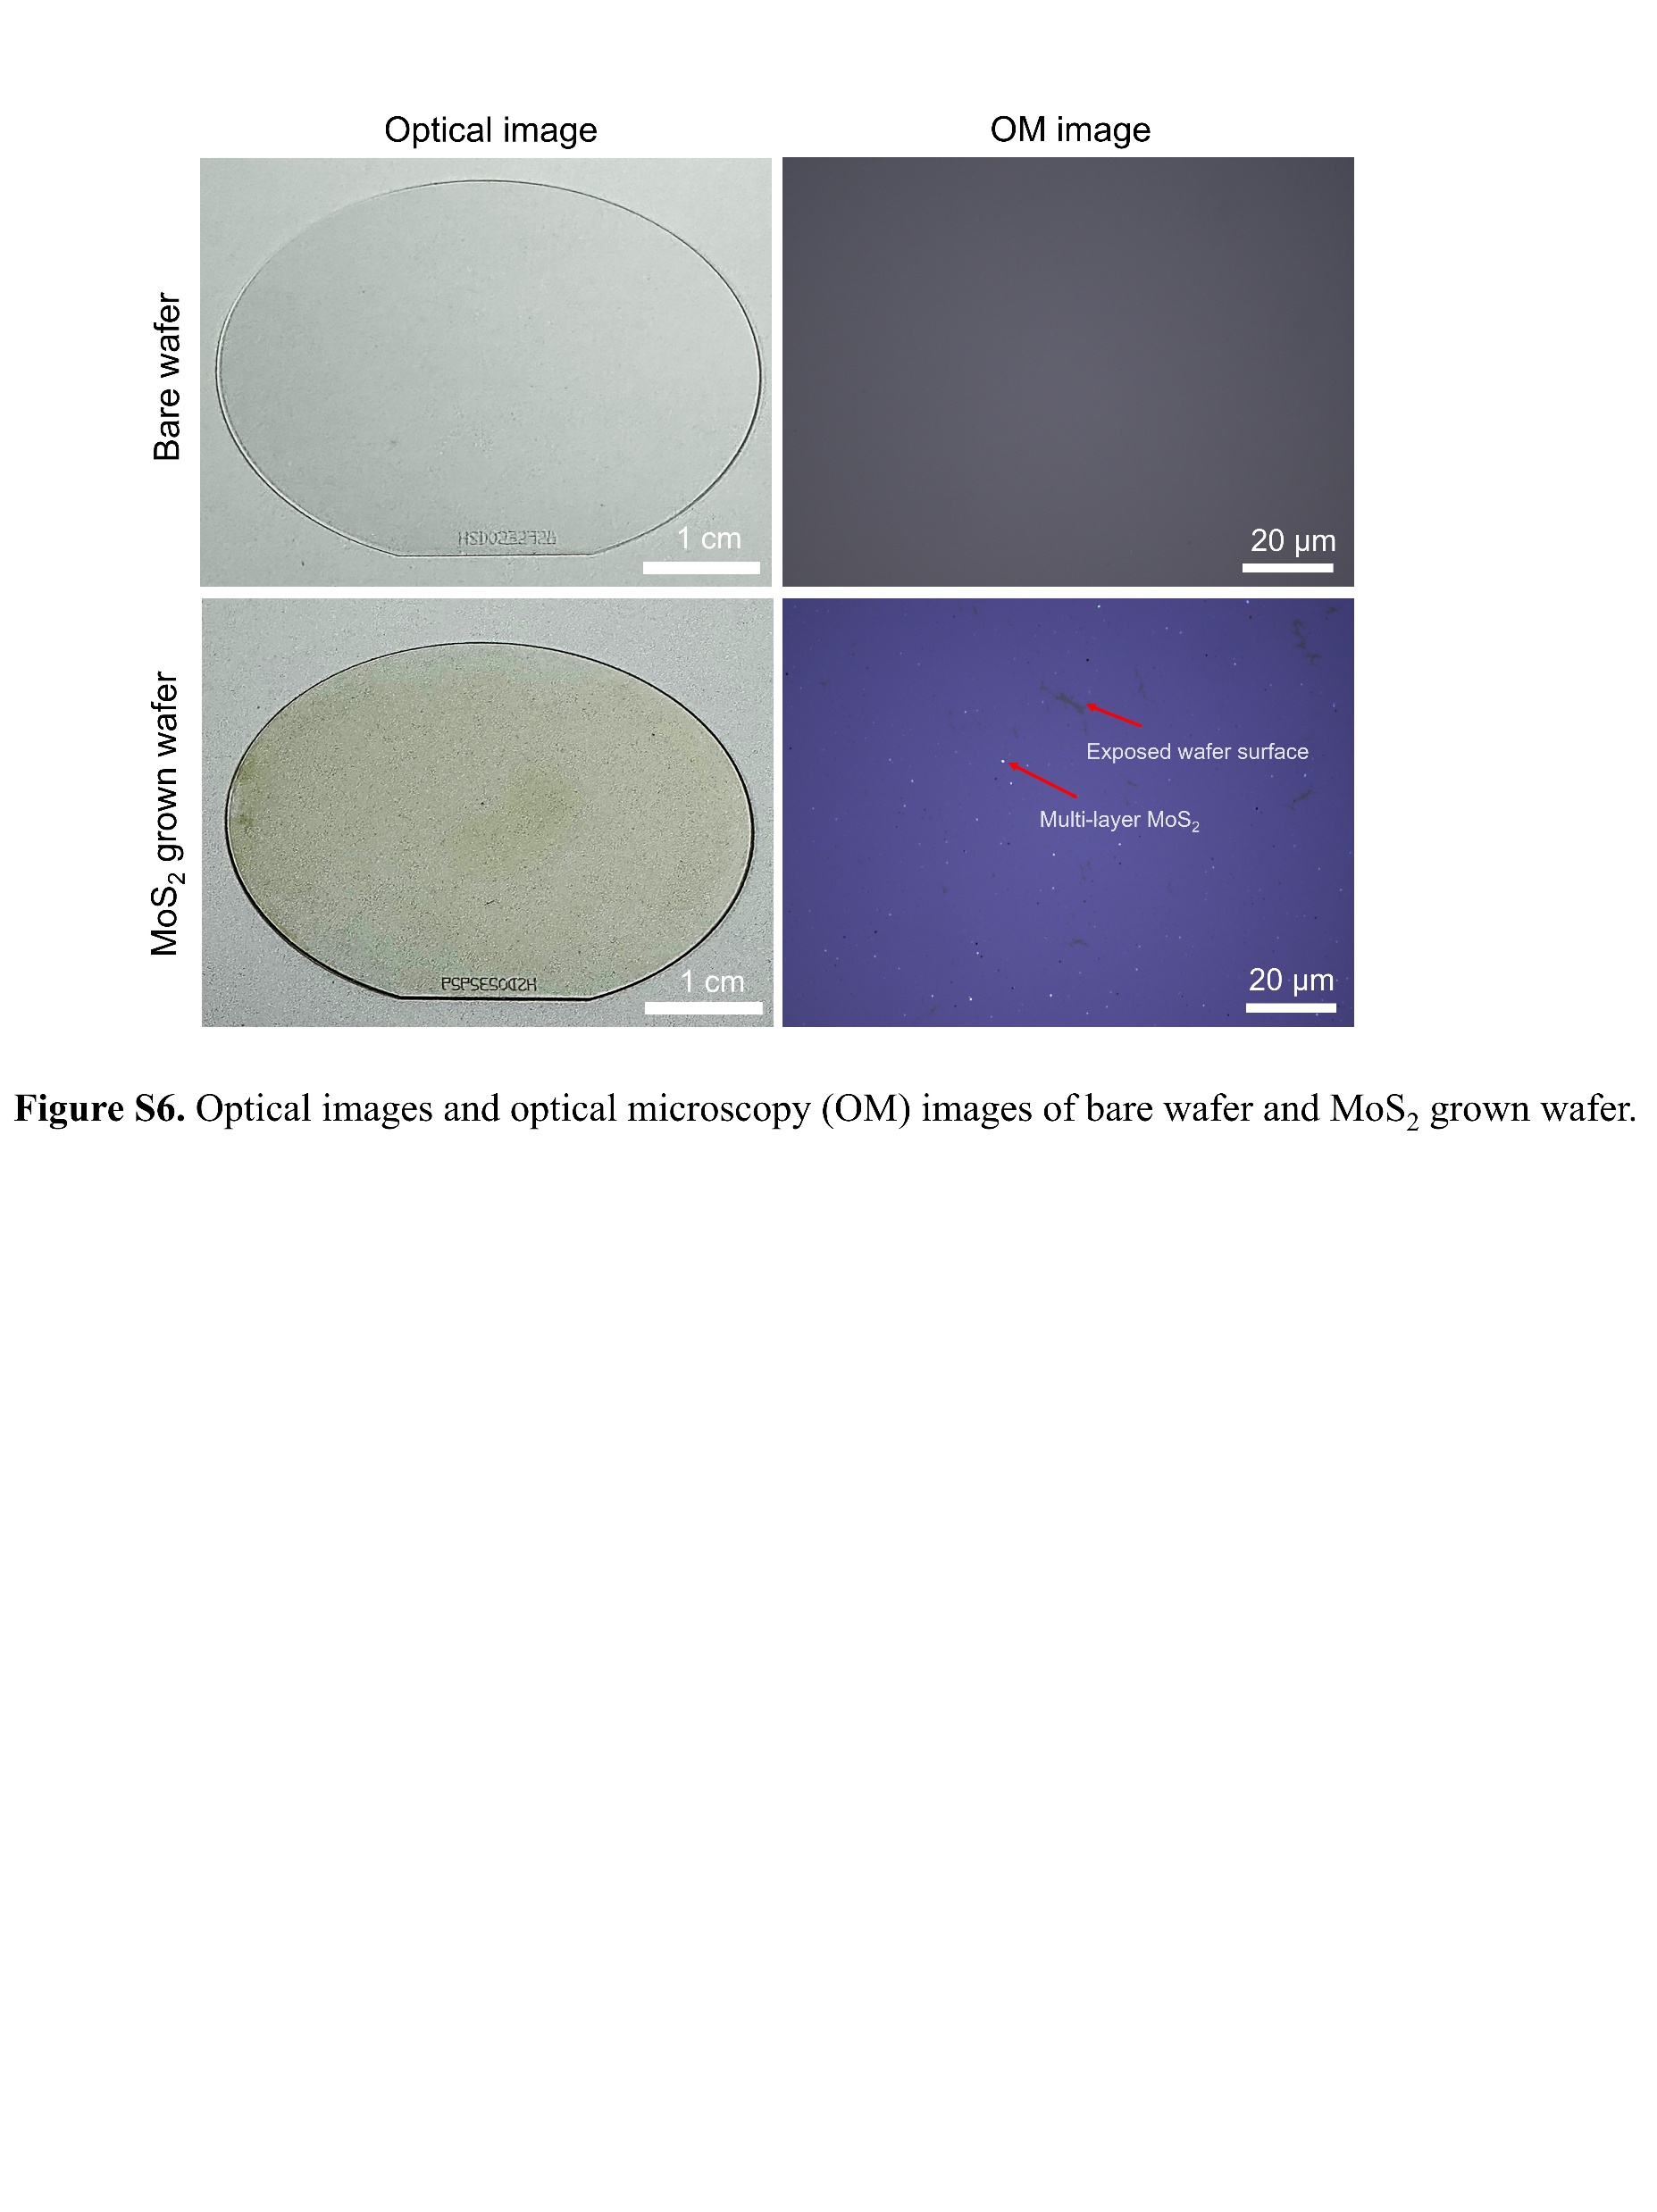


**Fig. S6.** Optical images and optical microscopy images of bare wafer and 2D MoS2-grown wafer.


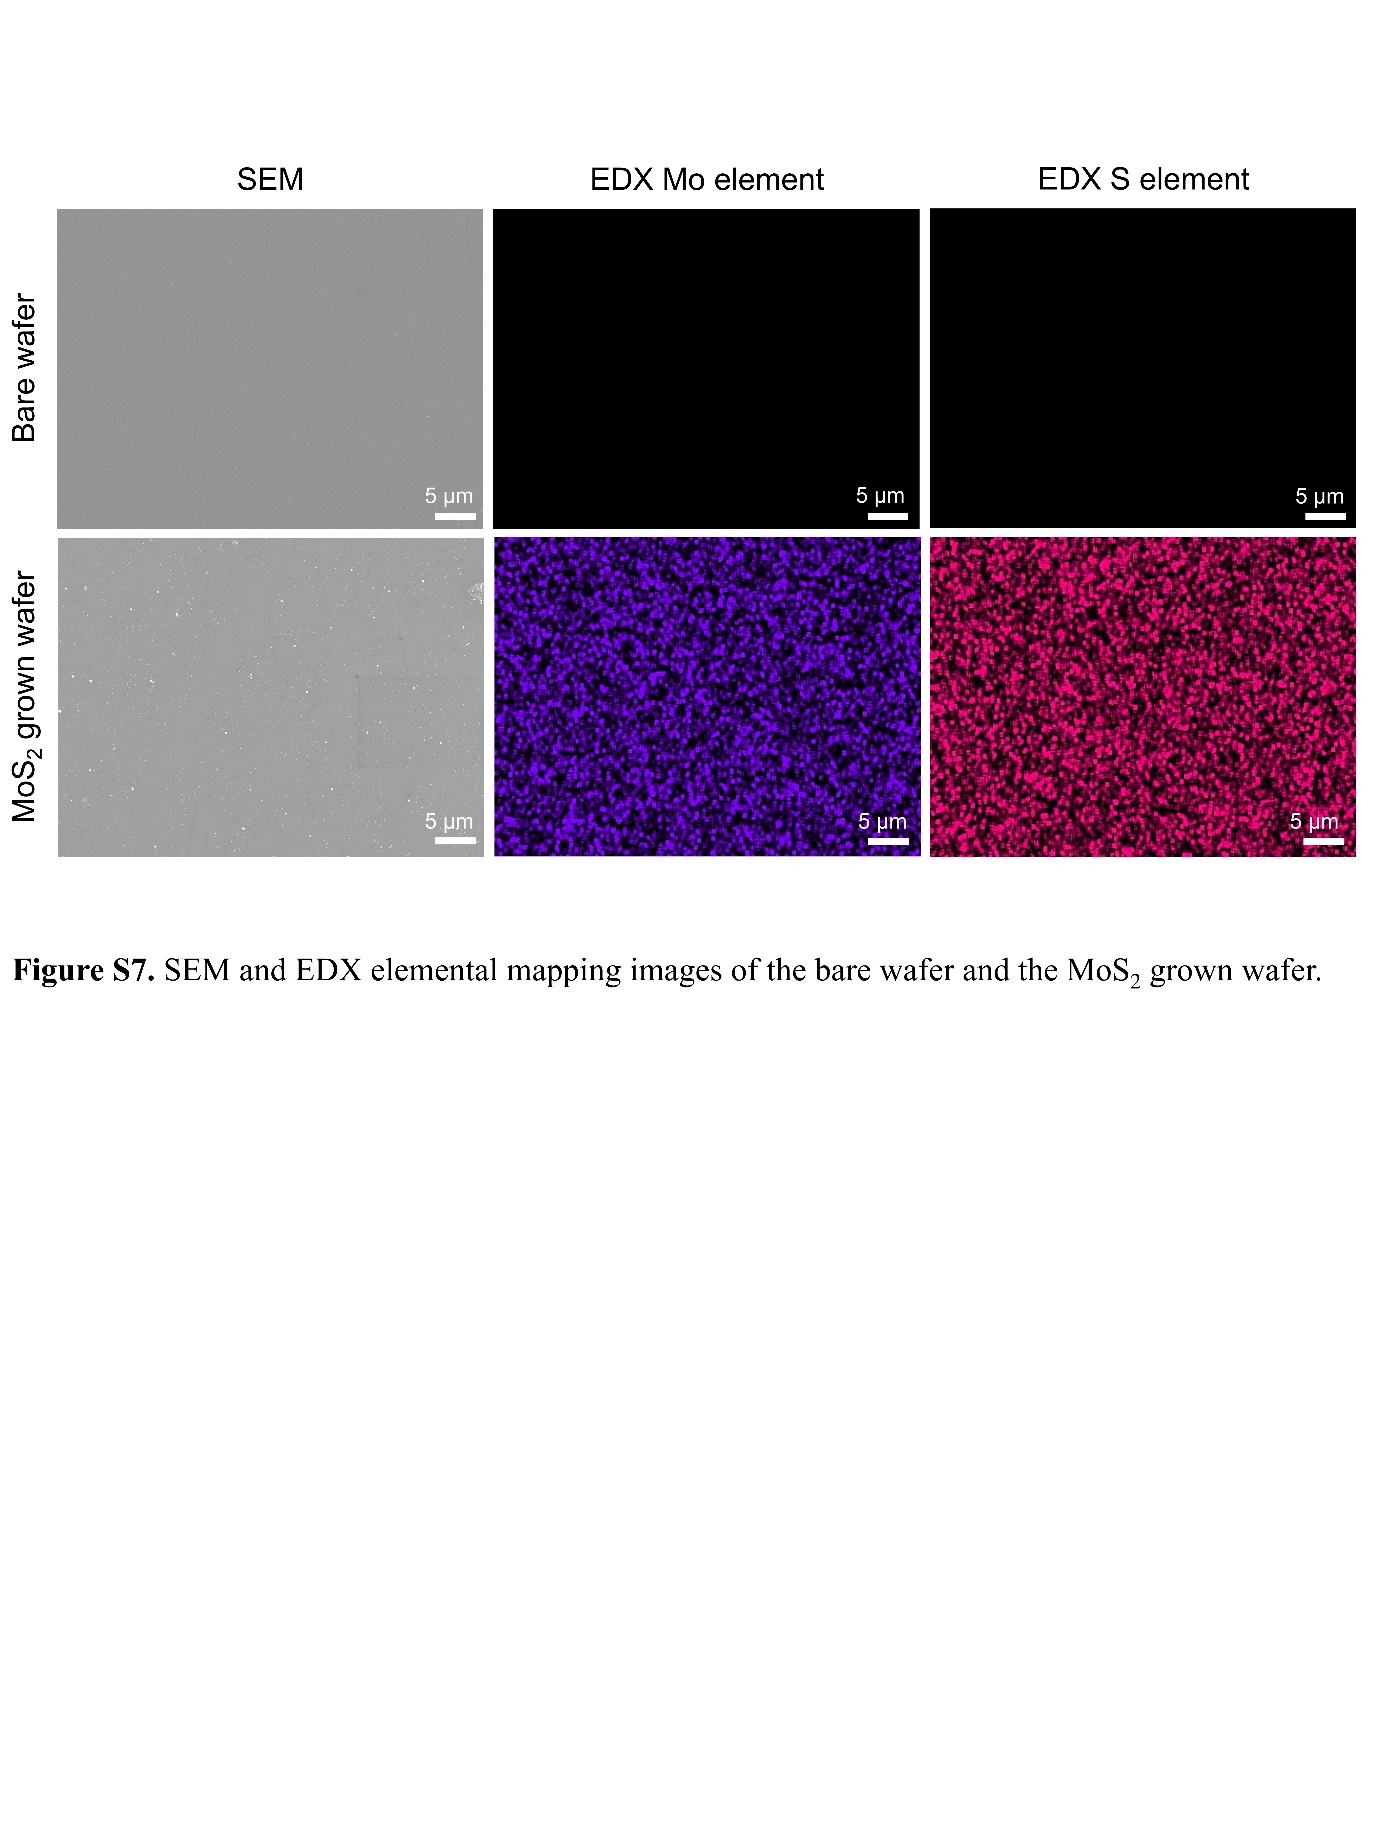


**Fig. S7.** SEM and EDX elemental mapping images of the bare wafer and the 2D MoS2 grown wafer.


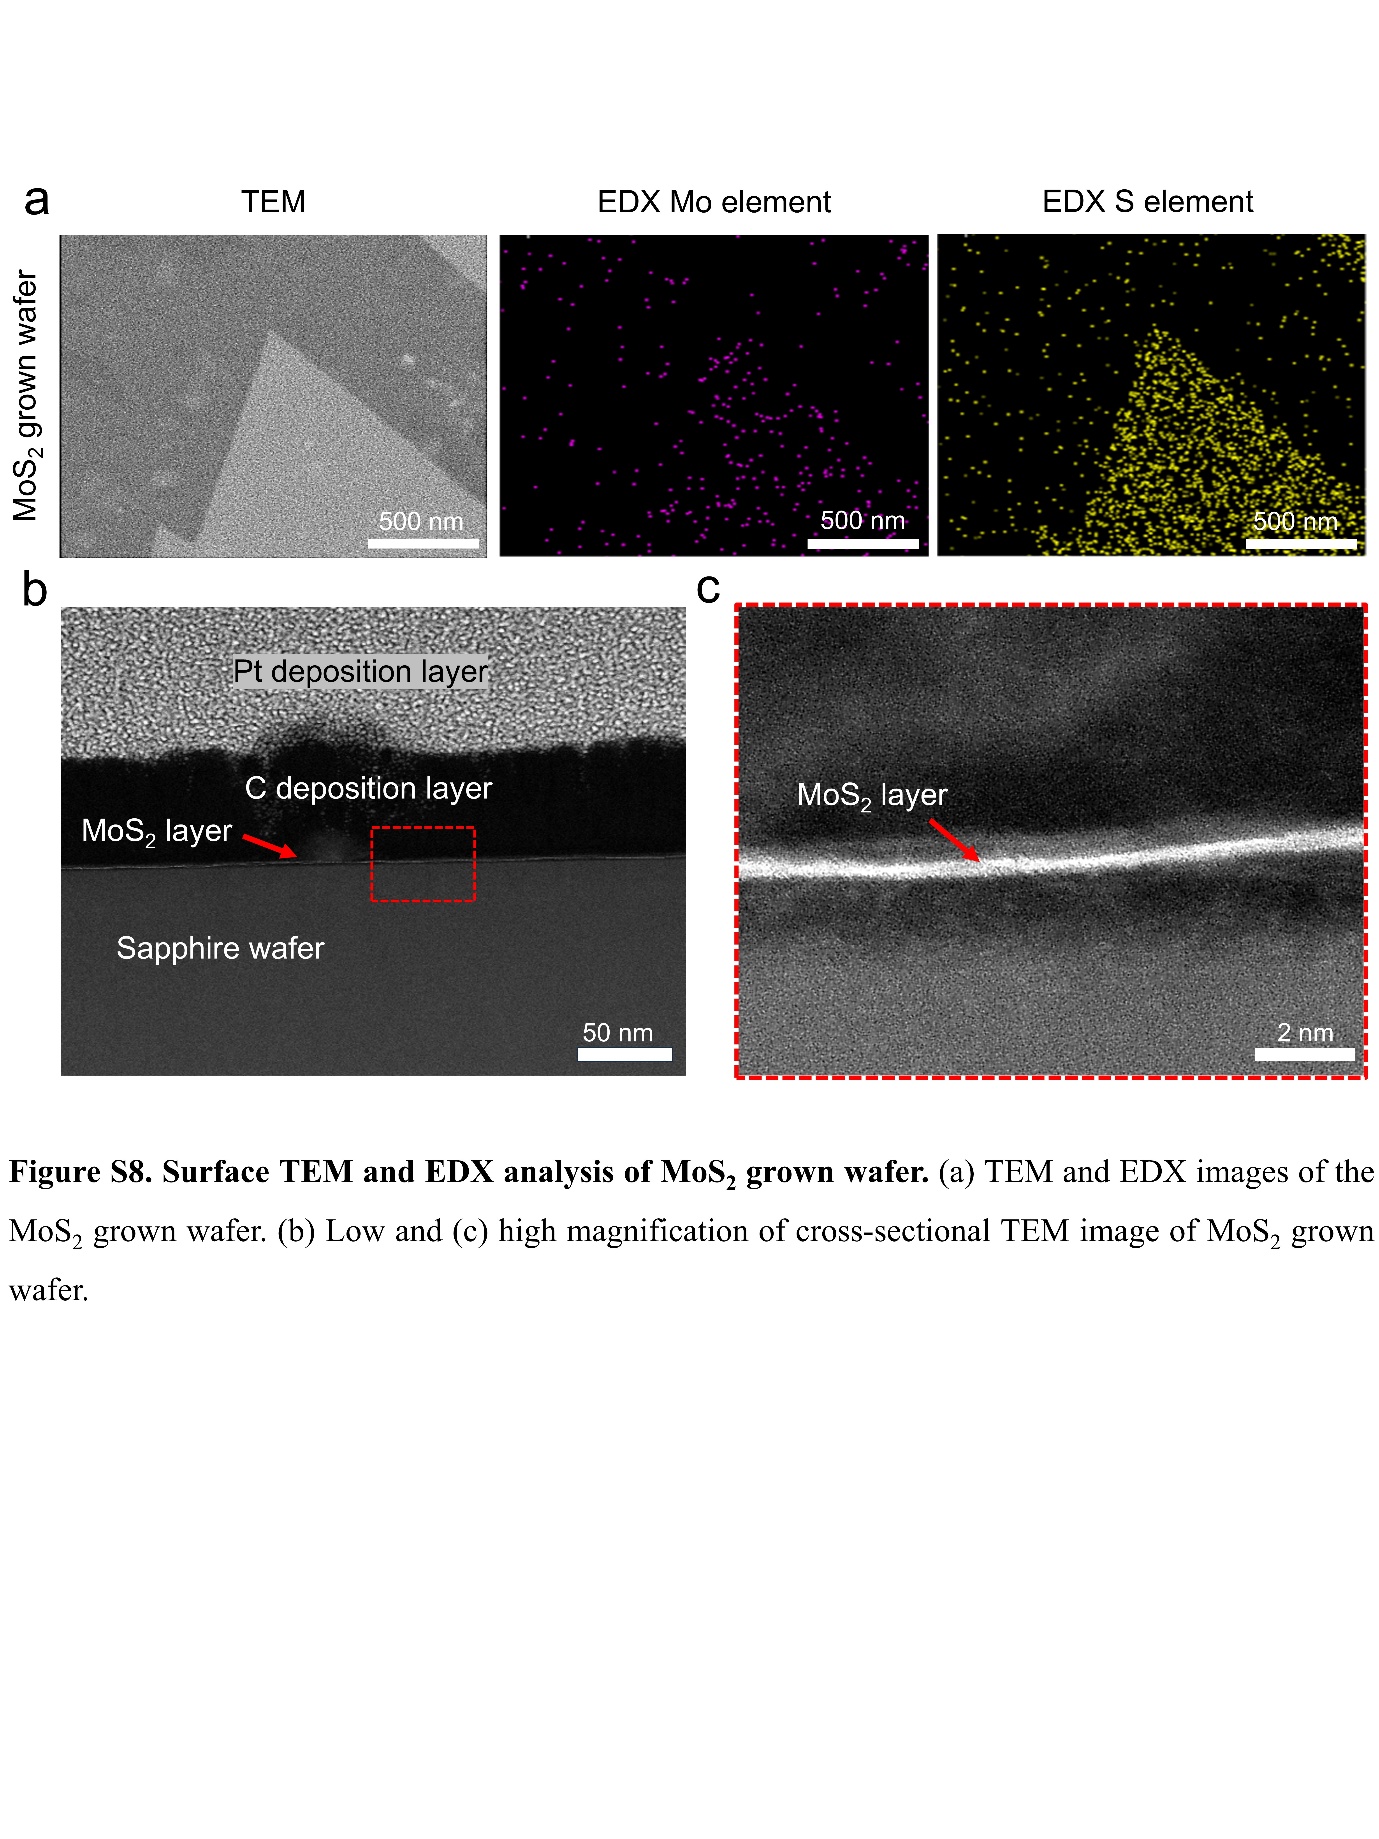


**Fig. S8. TEM and EDX analysis of 2D MoS2 grown wafer.** (a) Surface TEM and EDX images of the 2D MoS2 grown wafer. (b) Low and (c) high magnification of cross-sectional TEM image of 2D MoS2 grown wafer.


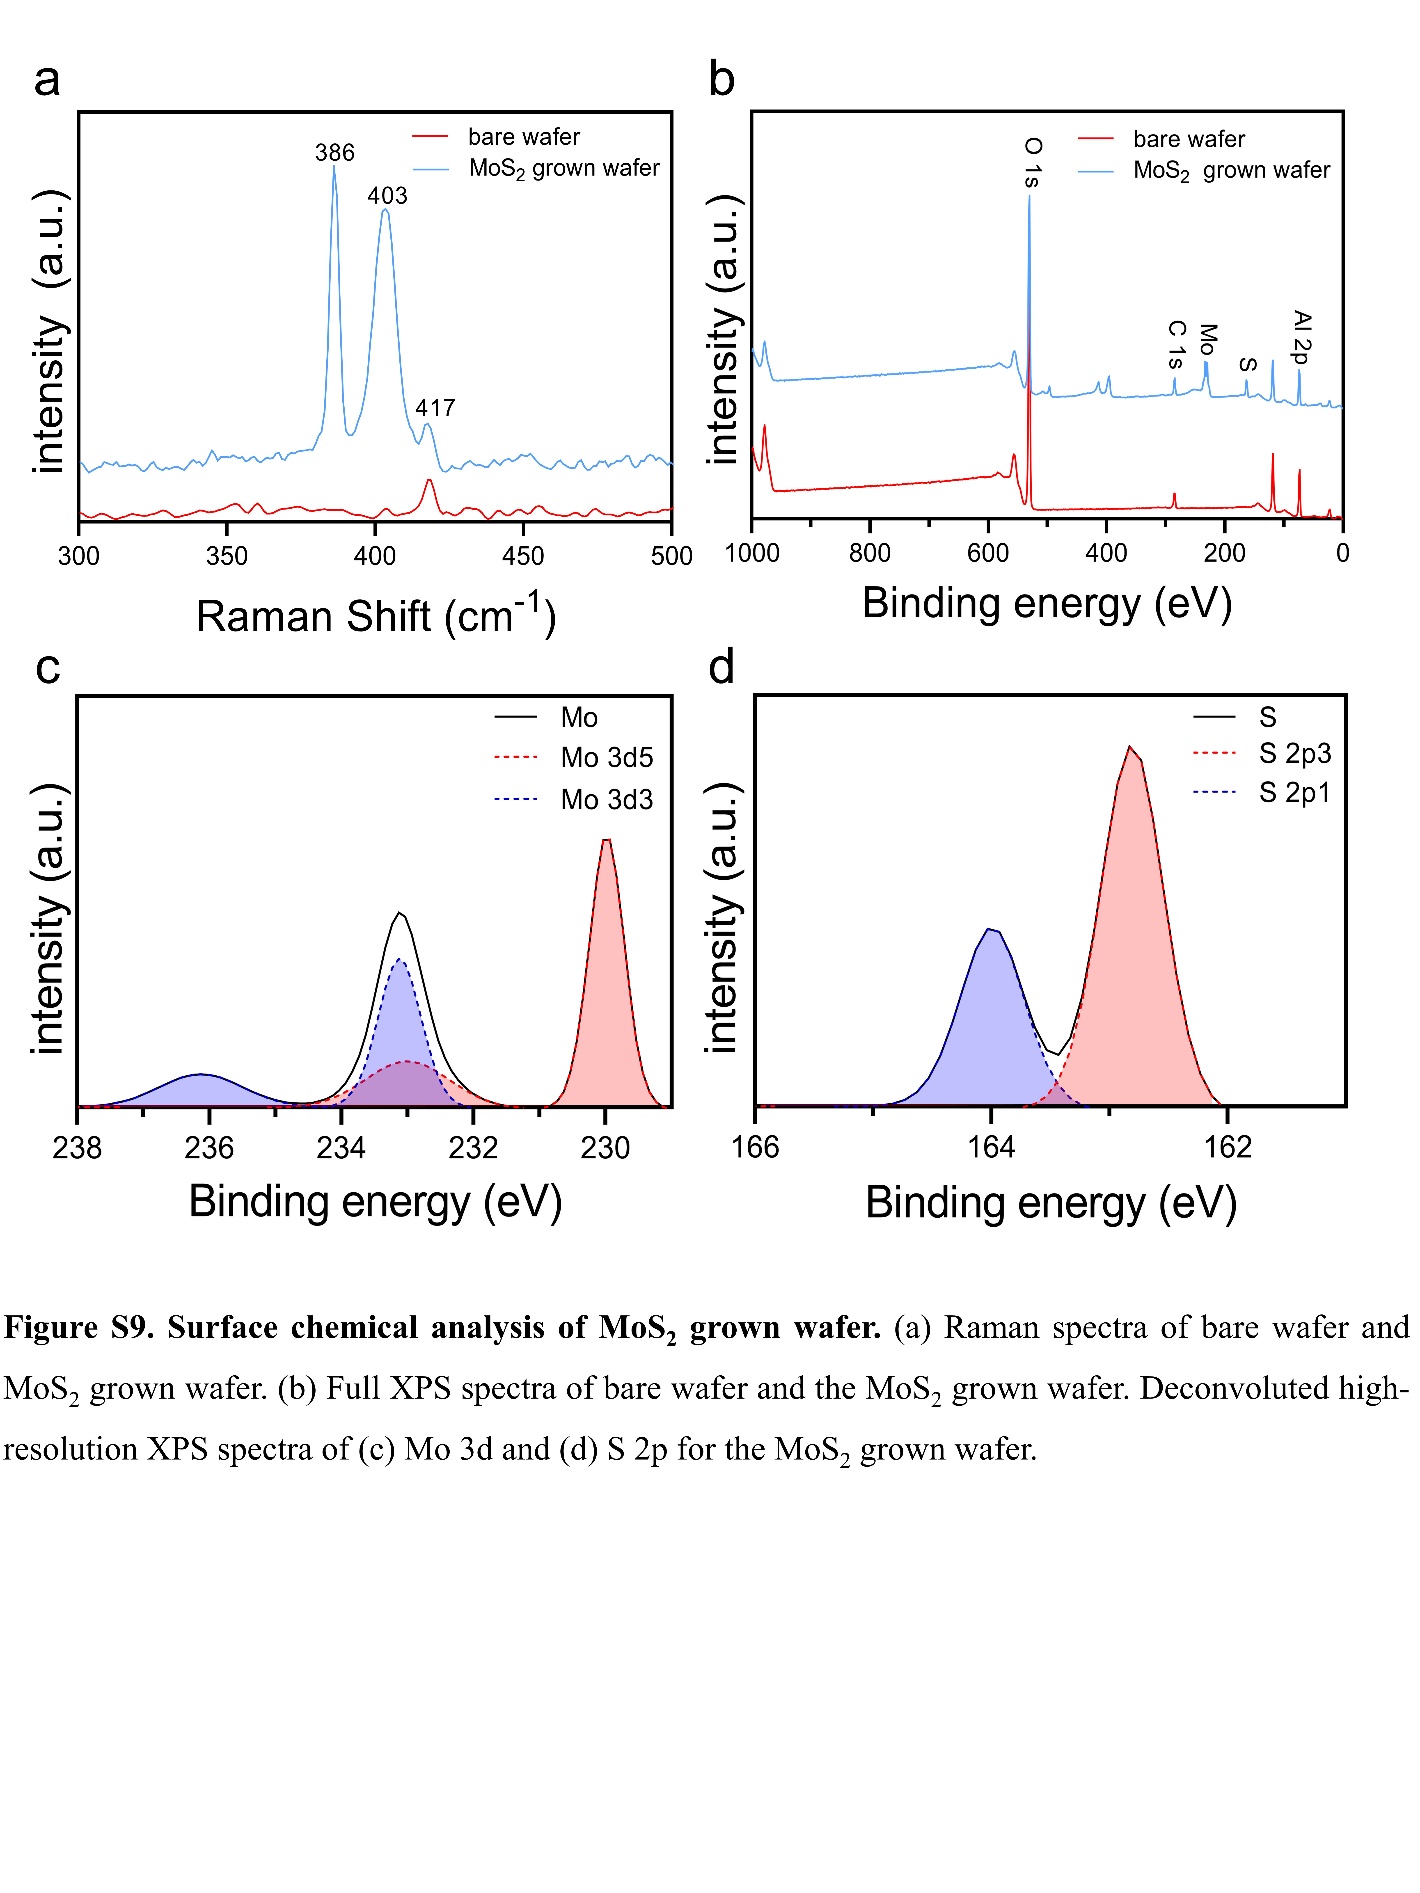


**Fig. S9. Surface chemical analysis of 2D MoS2 grown wafer.** (a) Raman spectra of bare wafer and 2D MoS2 grown wafer. (b) Full XPS spectra of bare wafer and the MoS2-coated wafer. Deconvoluted high-resolution XPS spectra of (c) Mo 3d and (d) S 2p for the 2D MoS2 grown wafer.


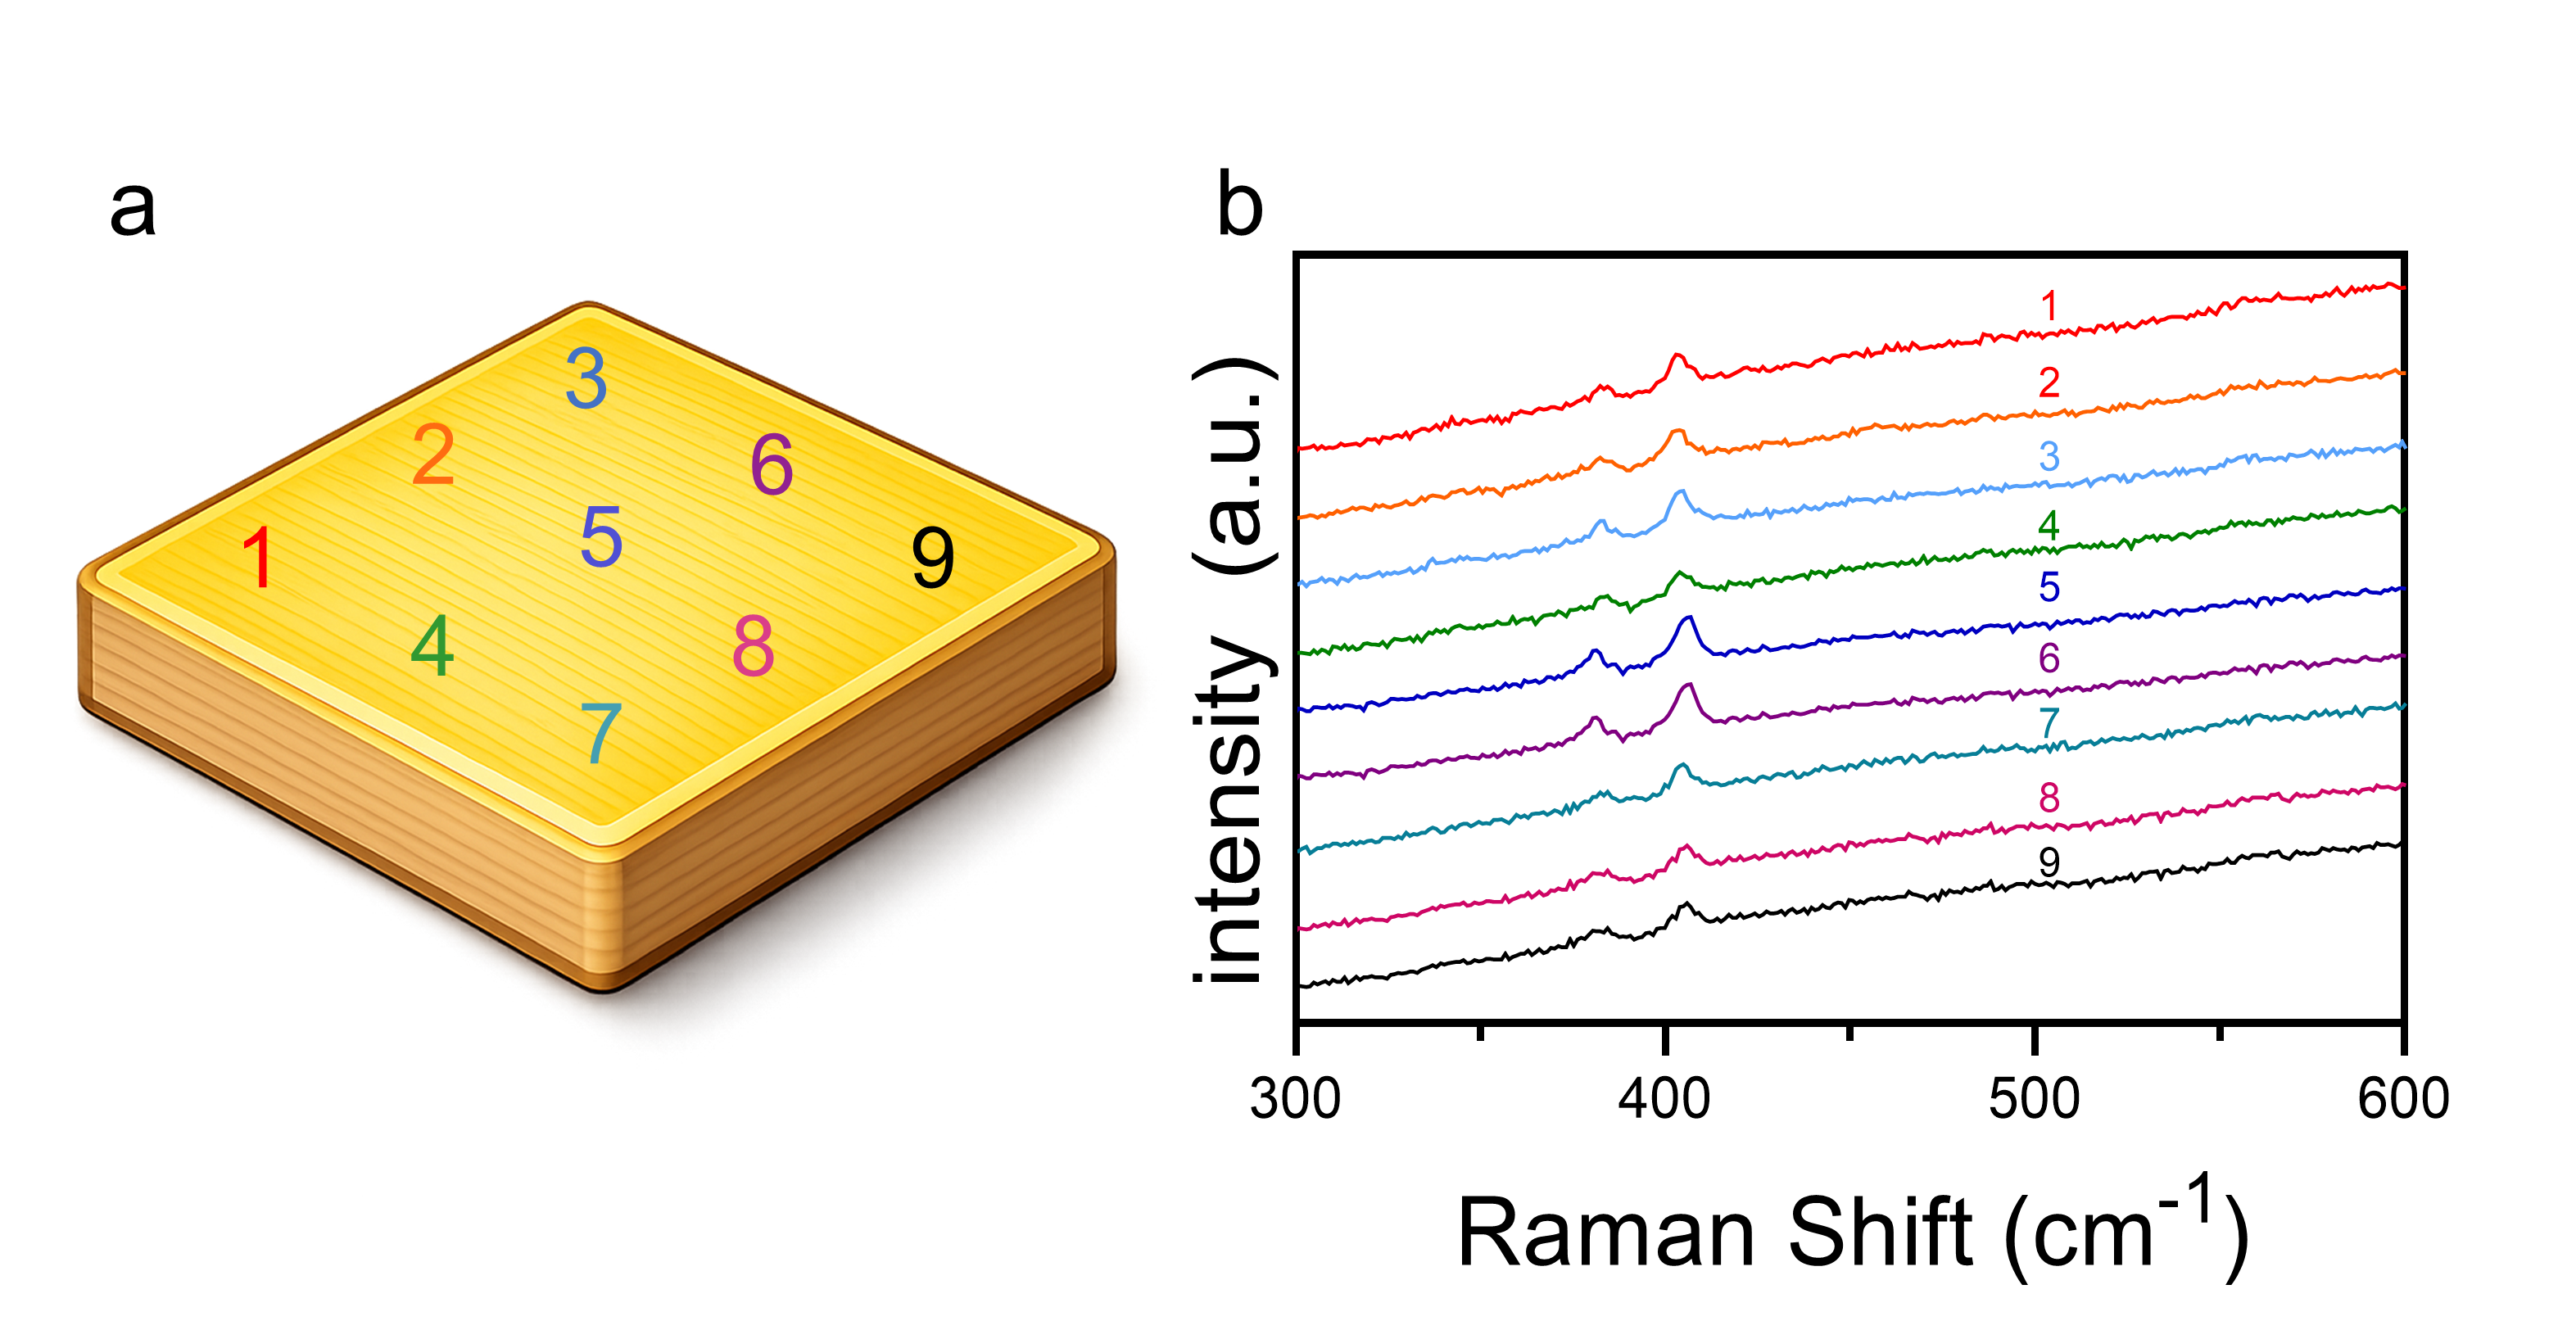


**Fig. S10. Region-resolved Raman spectra of MoS₂@PEEK.** (a) Positions of Raman analysis on MoS2@PEEK. (b) Raman spectra of the MoS2@PEEK from position 1 to 9.

**
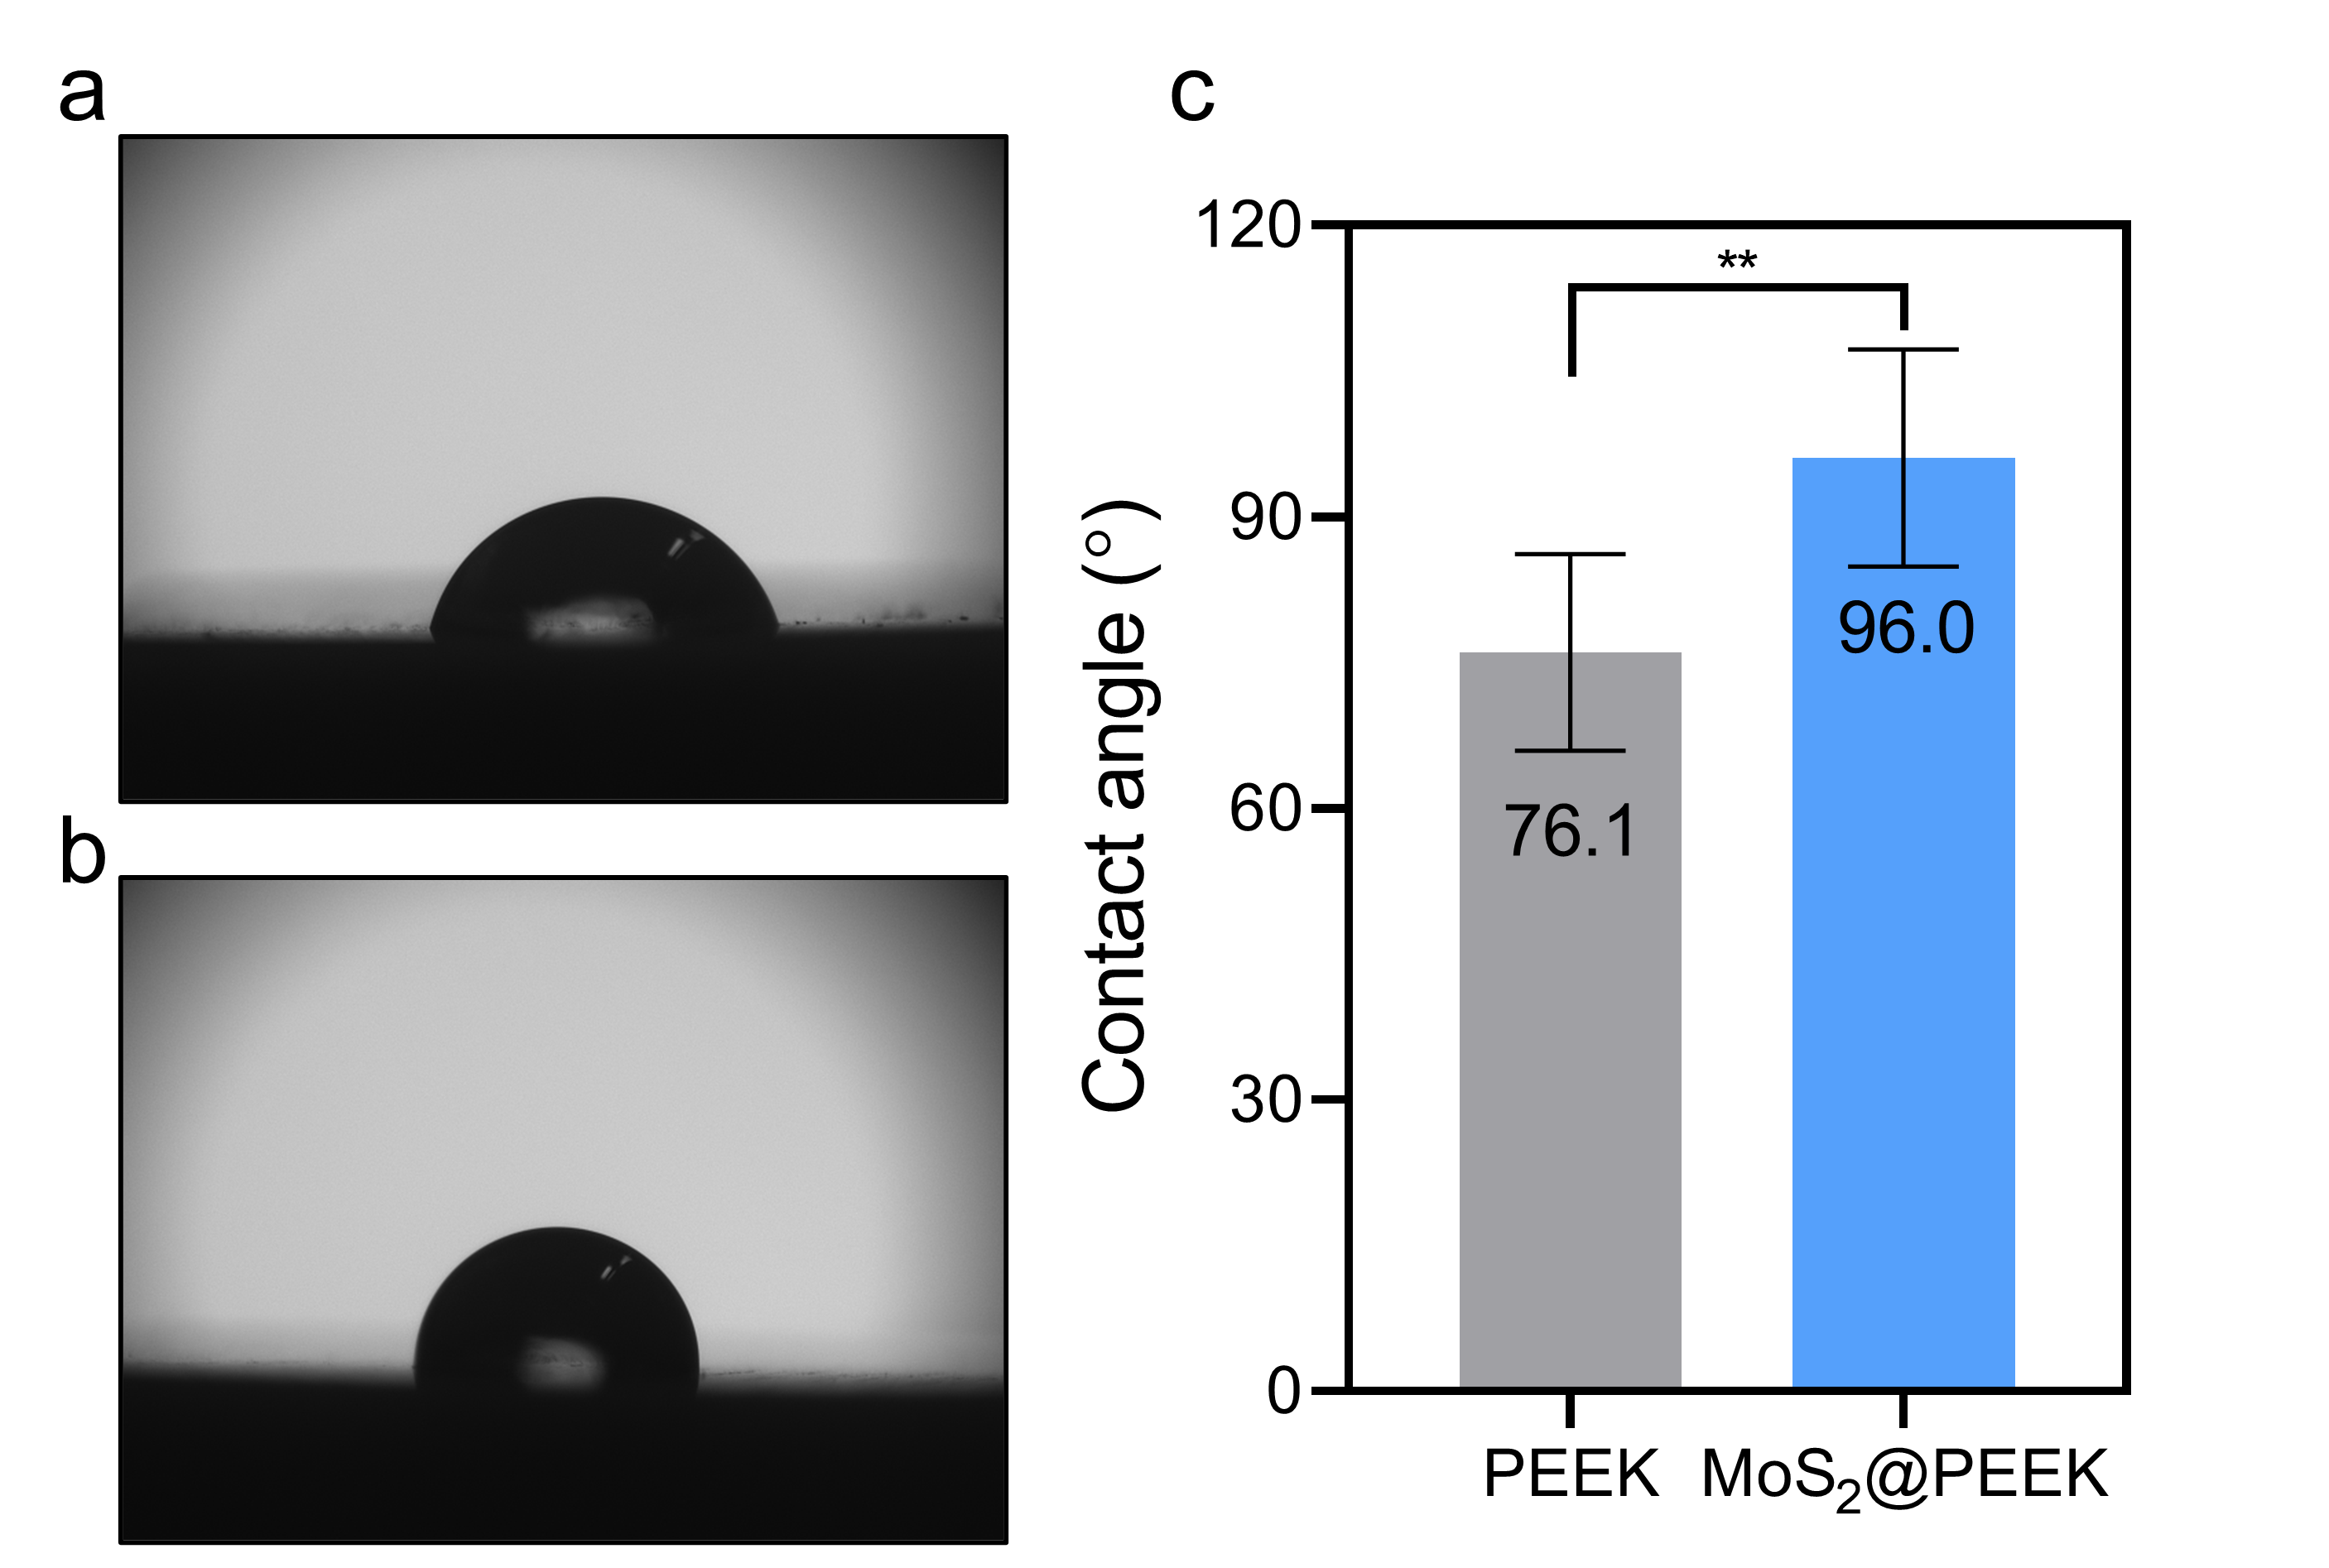
**

**Fig. S11. Water contact angle (WCA) comparison between PEEK and MoS2@PEEK.** Representative images of water droplets on the surfaces of (a) PEEK and (b) MoS2@PEEK. (c) The average contact angles of the PEEK and the MoS2@PEEK (n = 3). Data are shown as mean ± standard deviation (SD). Normality was assessed using the Shapiro-Wilk test. Statistical significance between two groups was determined using an unpaired Student’s T-test, with significance at *p<0.05, **p<0.01, ***p<0.005, and ****p<0.001.

**Fig. S12.** Temperature elevation profiles under NIR irradiation with a wavelength of 650 nm.

**Fig. S13.** Time-dependent singlet oxygen generation evaluated by SOSG fluorescence intensity under 808 nm irradiation.

**
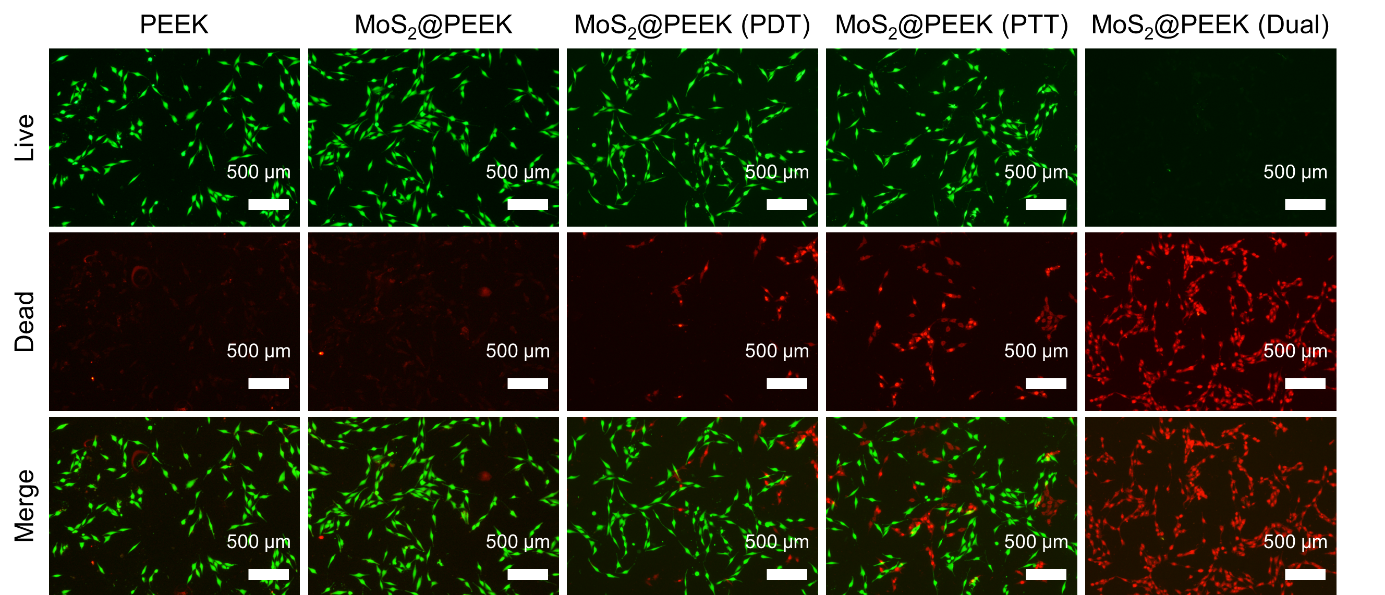
**

**Fig. S14.** Live and dead staining fluorescence images of cancer cells after 1 day of culture on different 3D-printed scaffolds.


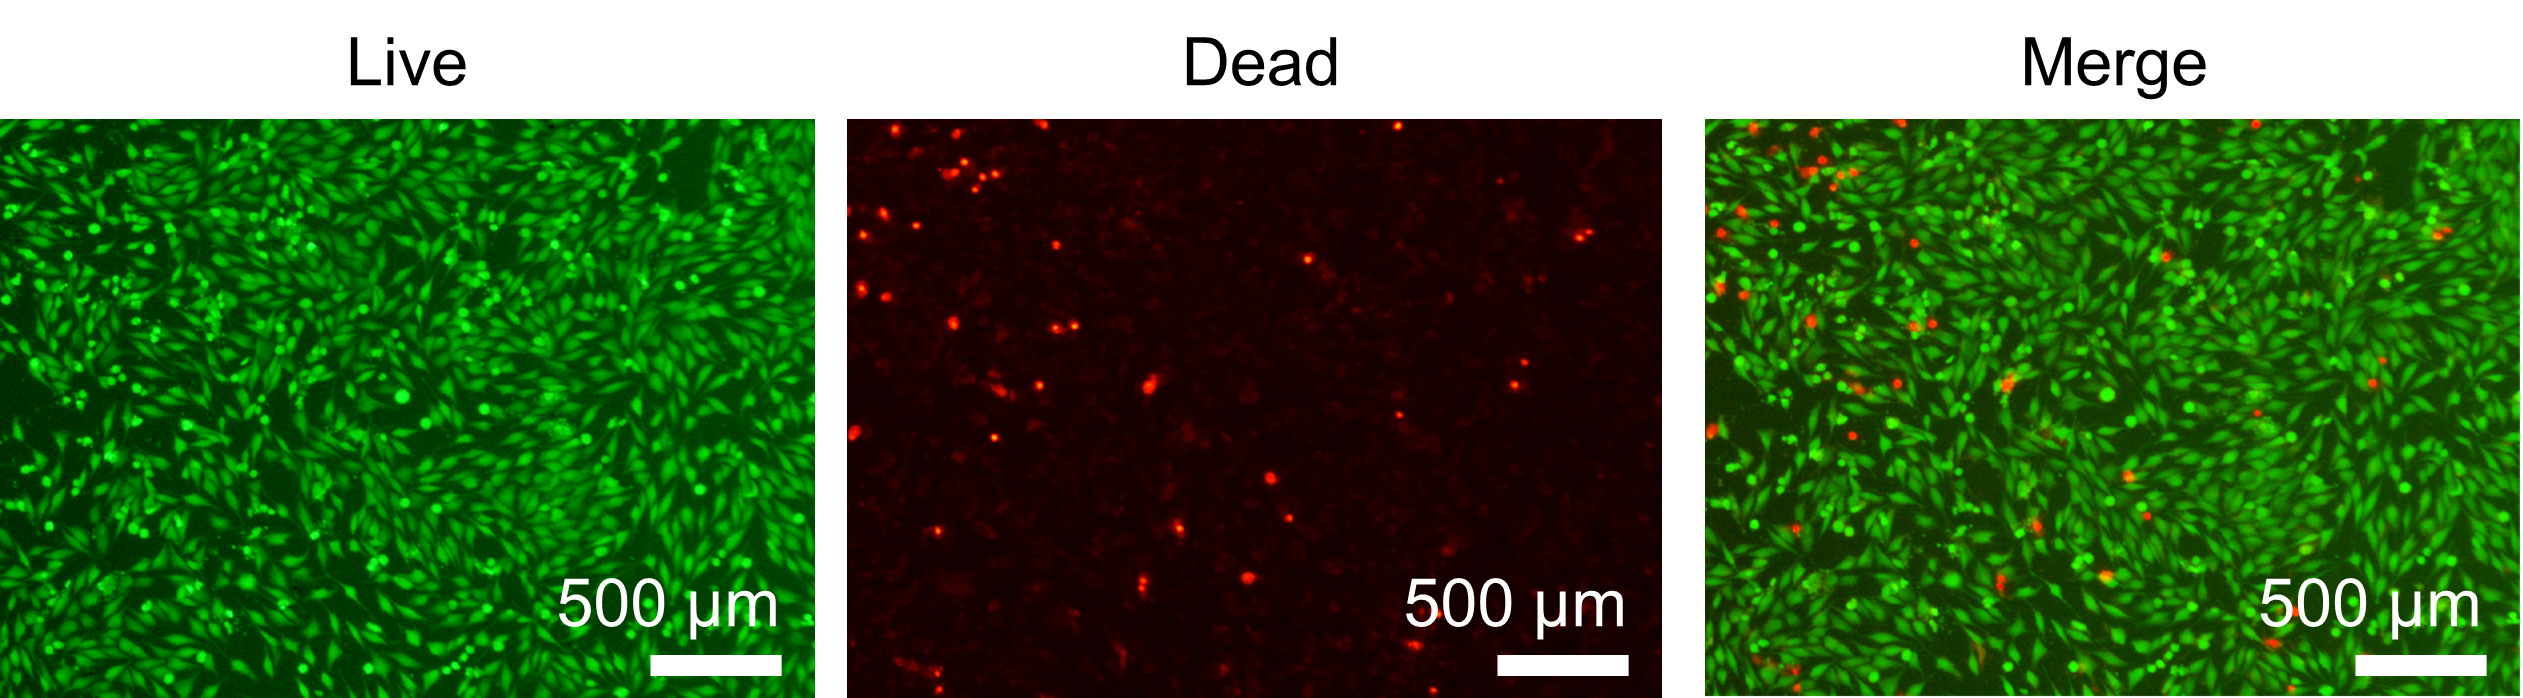


**Fig. S15.** Live and dead staining fluorescence images of cancer cells after 3 days of culture on 3D-printed PEEK scaffold.


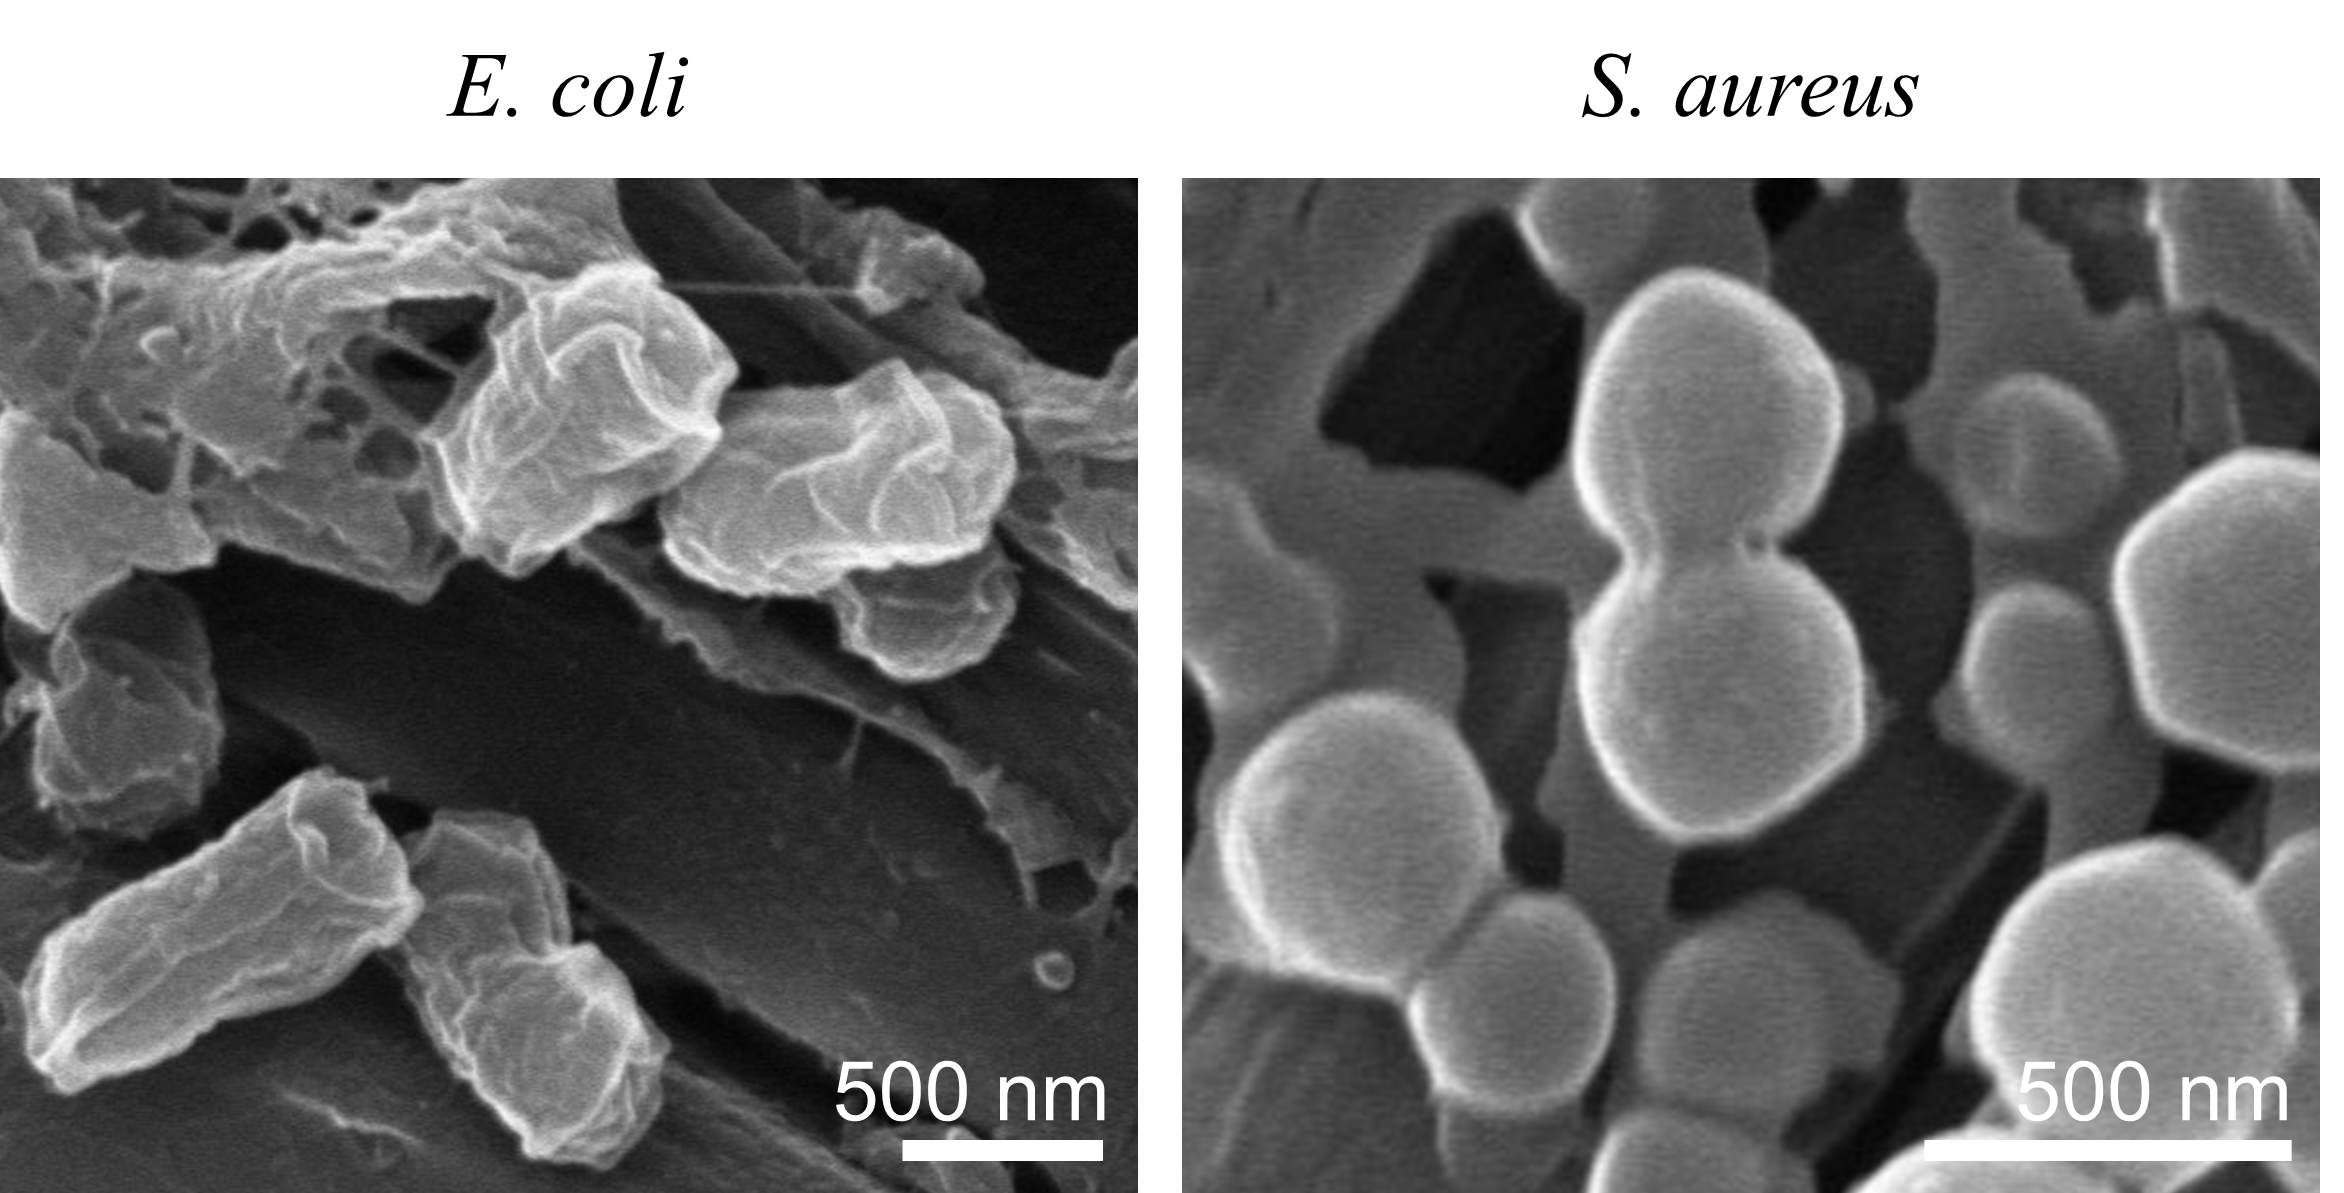


**Fig. S16.** SEM observation of *E. coli* and *S. aureus* attached to 3D-printed PEEK scaffold.


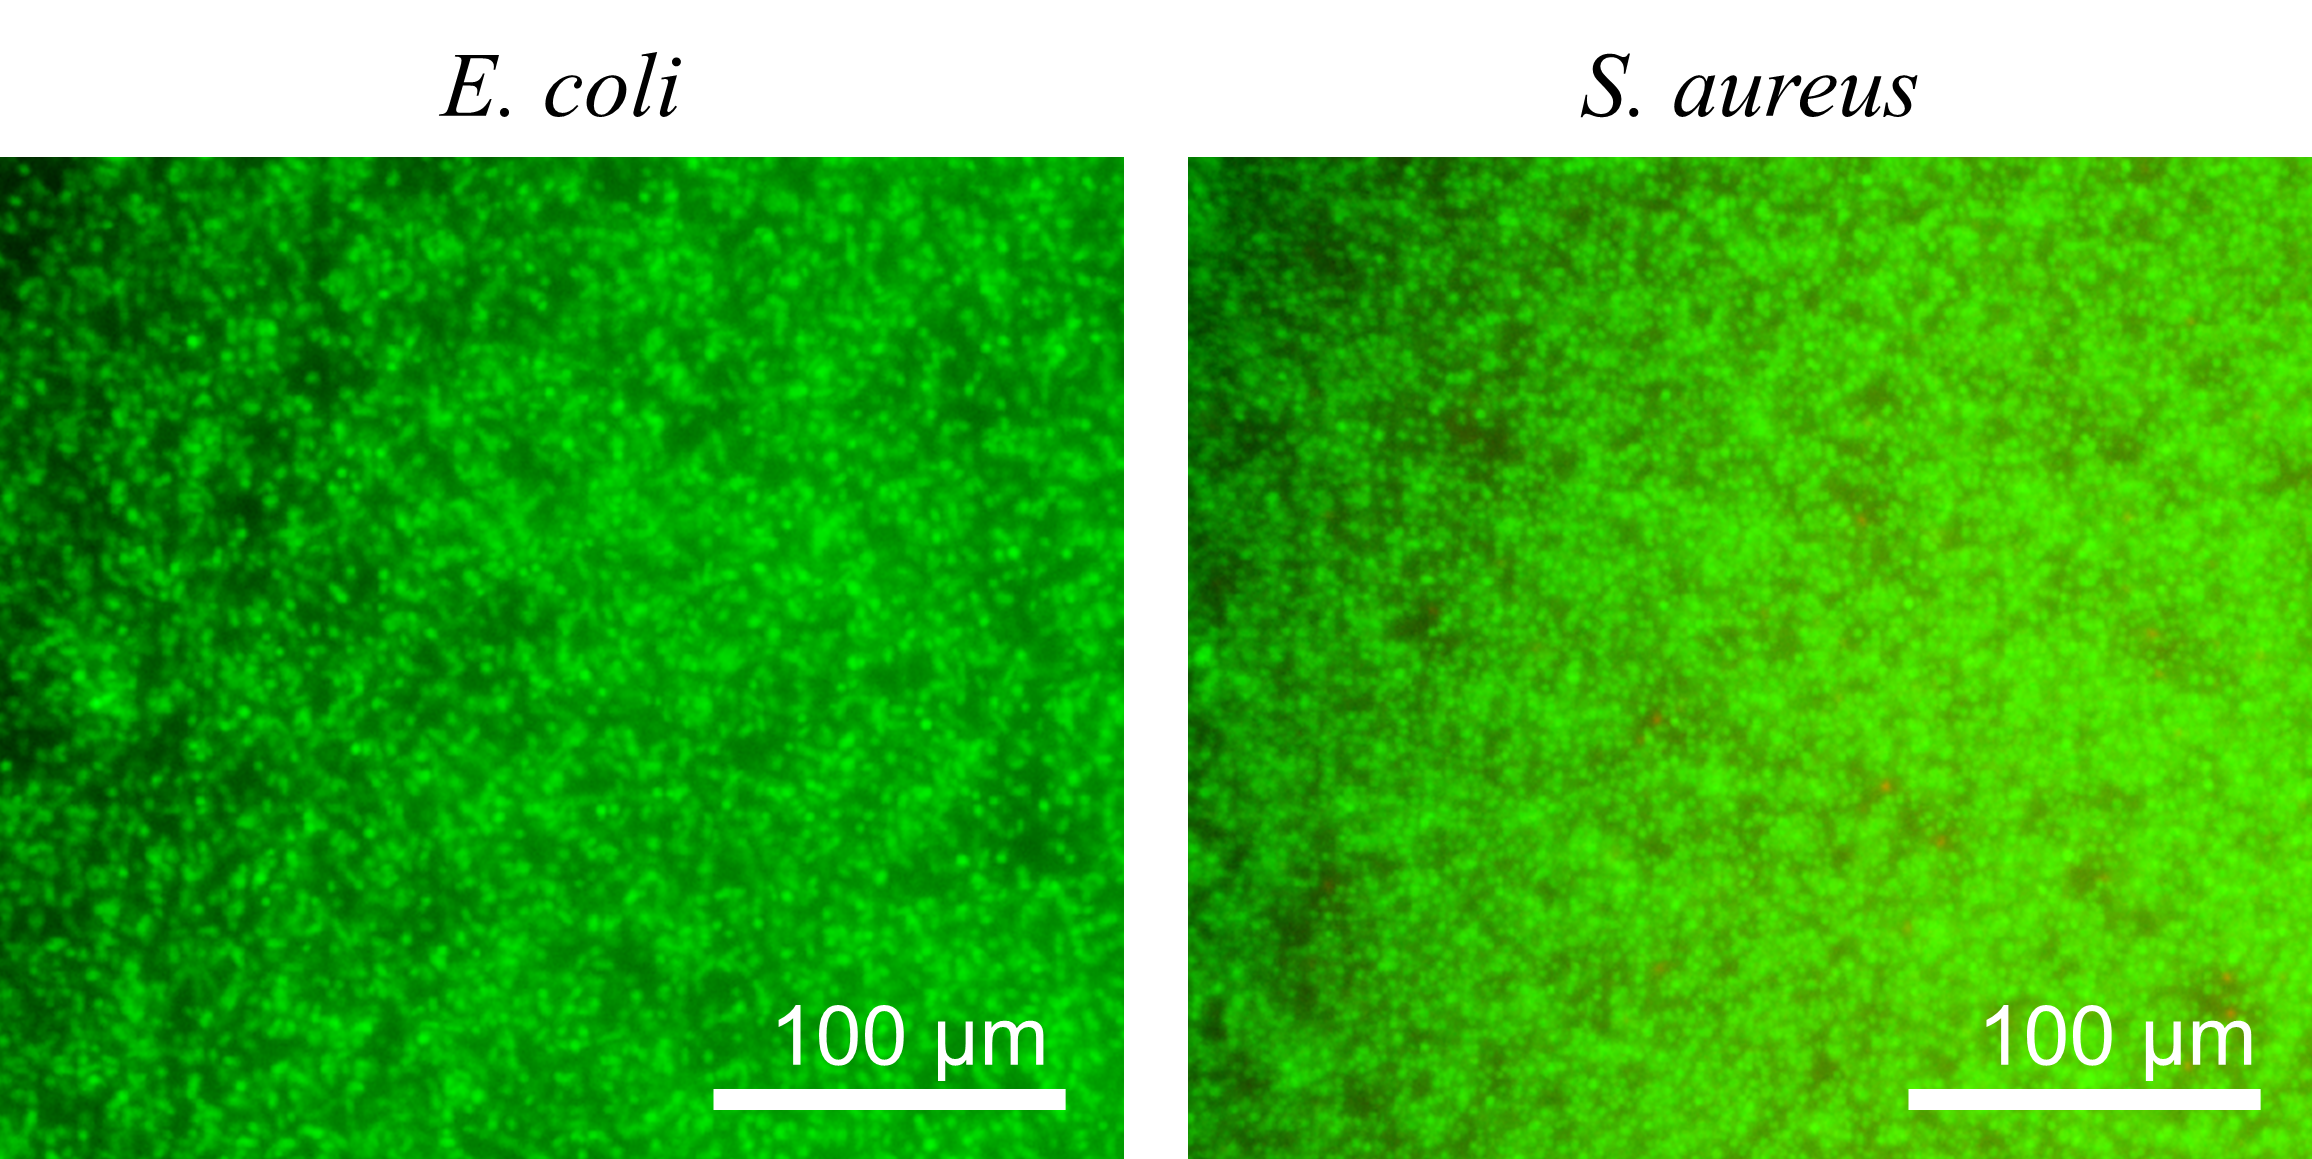


**Fig. S17.** Live and dead staining fluorescence images of *E. coli* and *S. aureus* attached to 3D-printed PEEK scaffold.


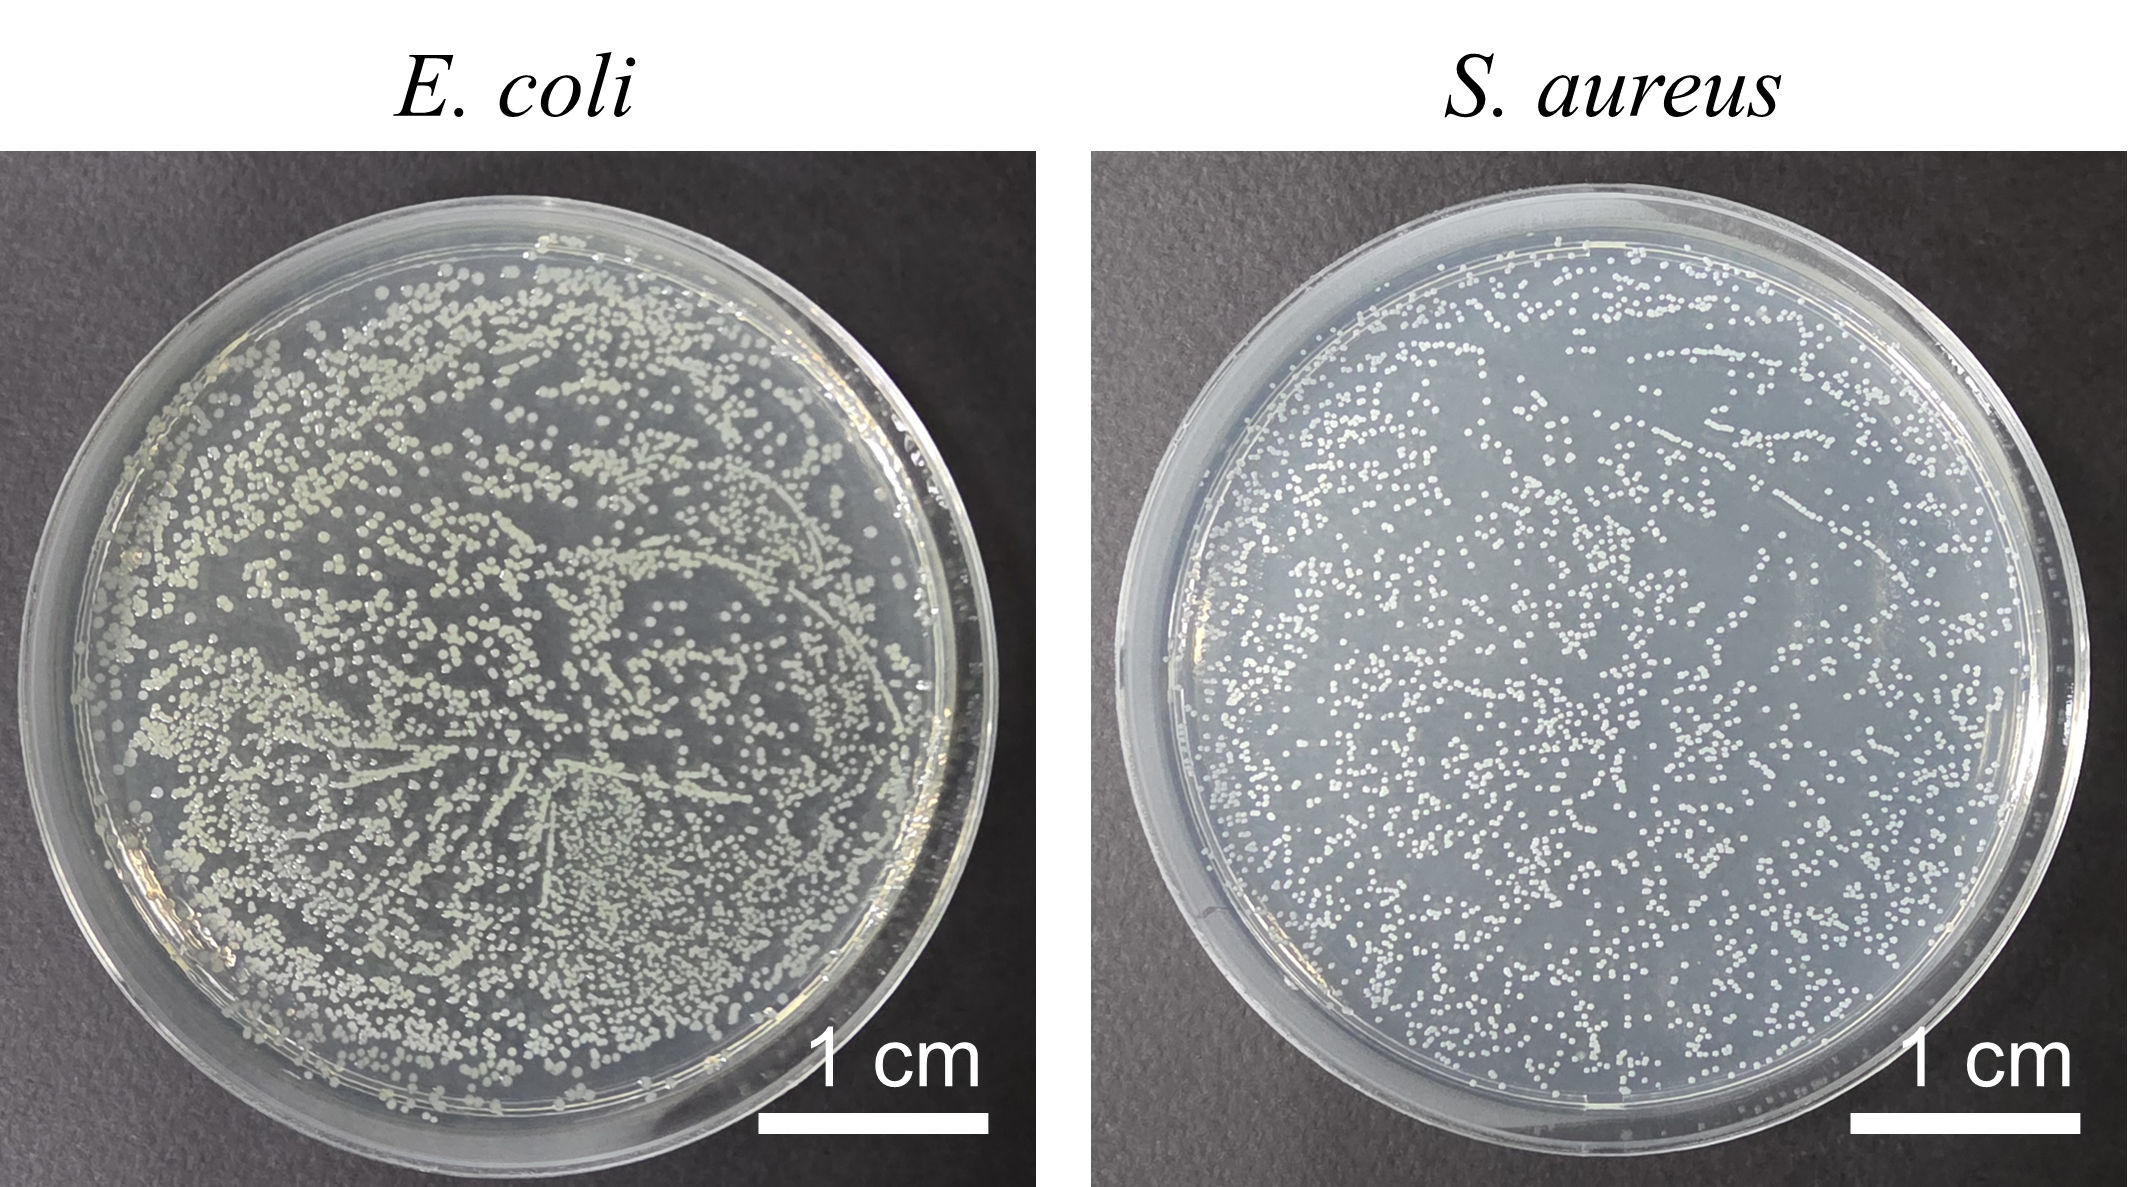


**Fig. S18.** Representative colony images of *E. coli* and *S. aureus* on 3D-printed PEEK scaffold.

**
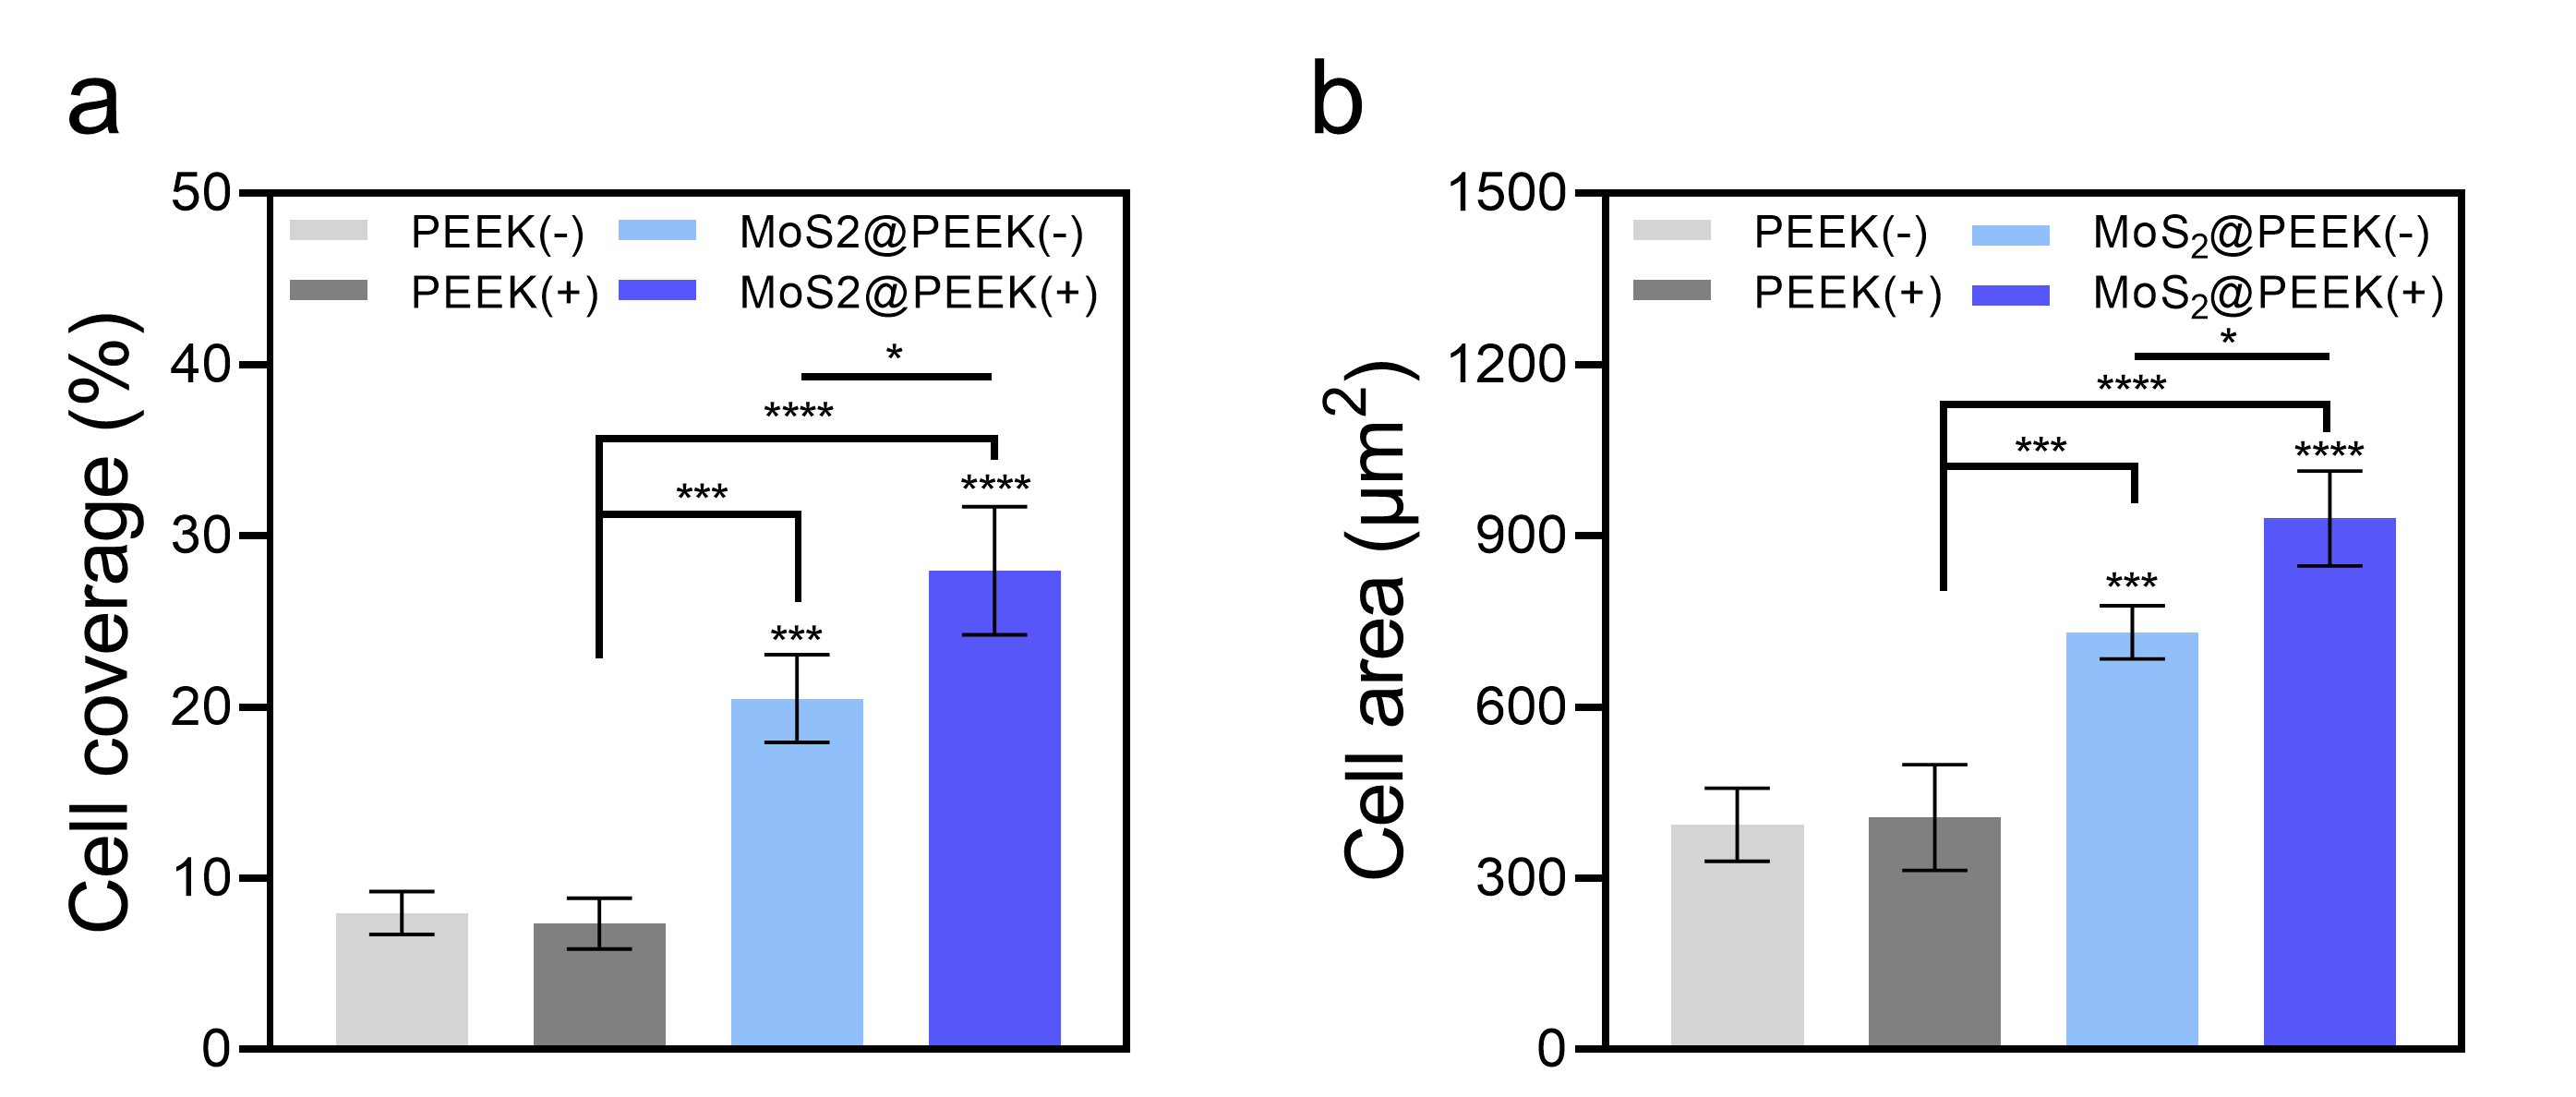
**

**Fig. S19. *In vitro* assessment of pre-osteoblast attachment.** (a)Quantitative analysis of cell adhesion coverage based on fluorescence imaging (n = 3). (b) Quantification of cell spreading area determined from SEM micrographs (n = 3). Data are shown as mean ± standard deviation (SD). Normality was tested using the Shapiro-Wilk method, and one-way ANOVA followed by Tukey’s HSD post hoc analysis was applied. For non-normally distributed data, statistical analysis was performed using the Kruskal-Wallis H test followed by pairwise comparisons with the Mann-Whitney U test, with significance at *p<0.05, **p<0.01, ***p<0.005, and ****p<0.001.


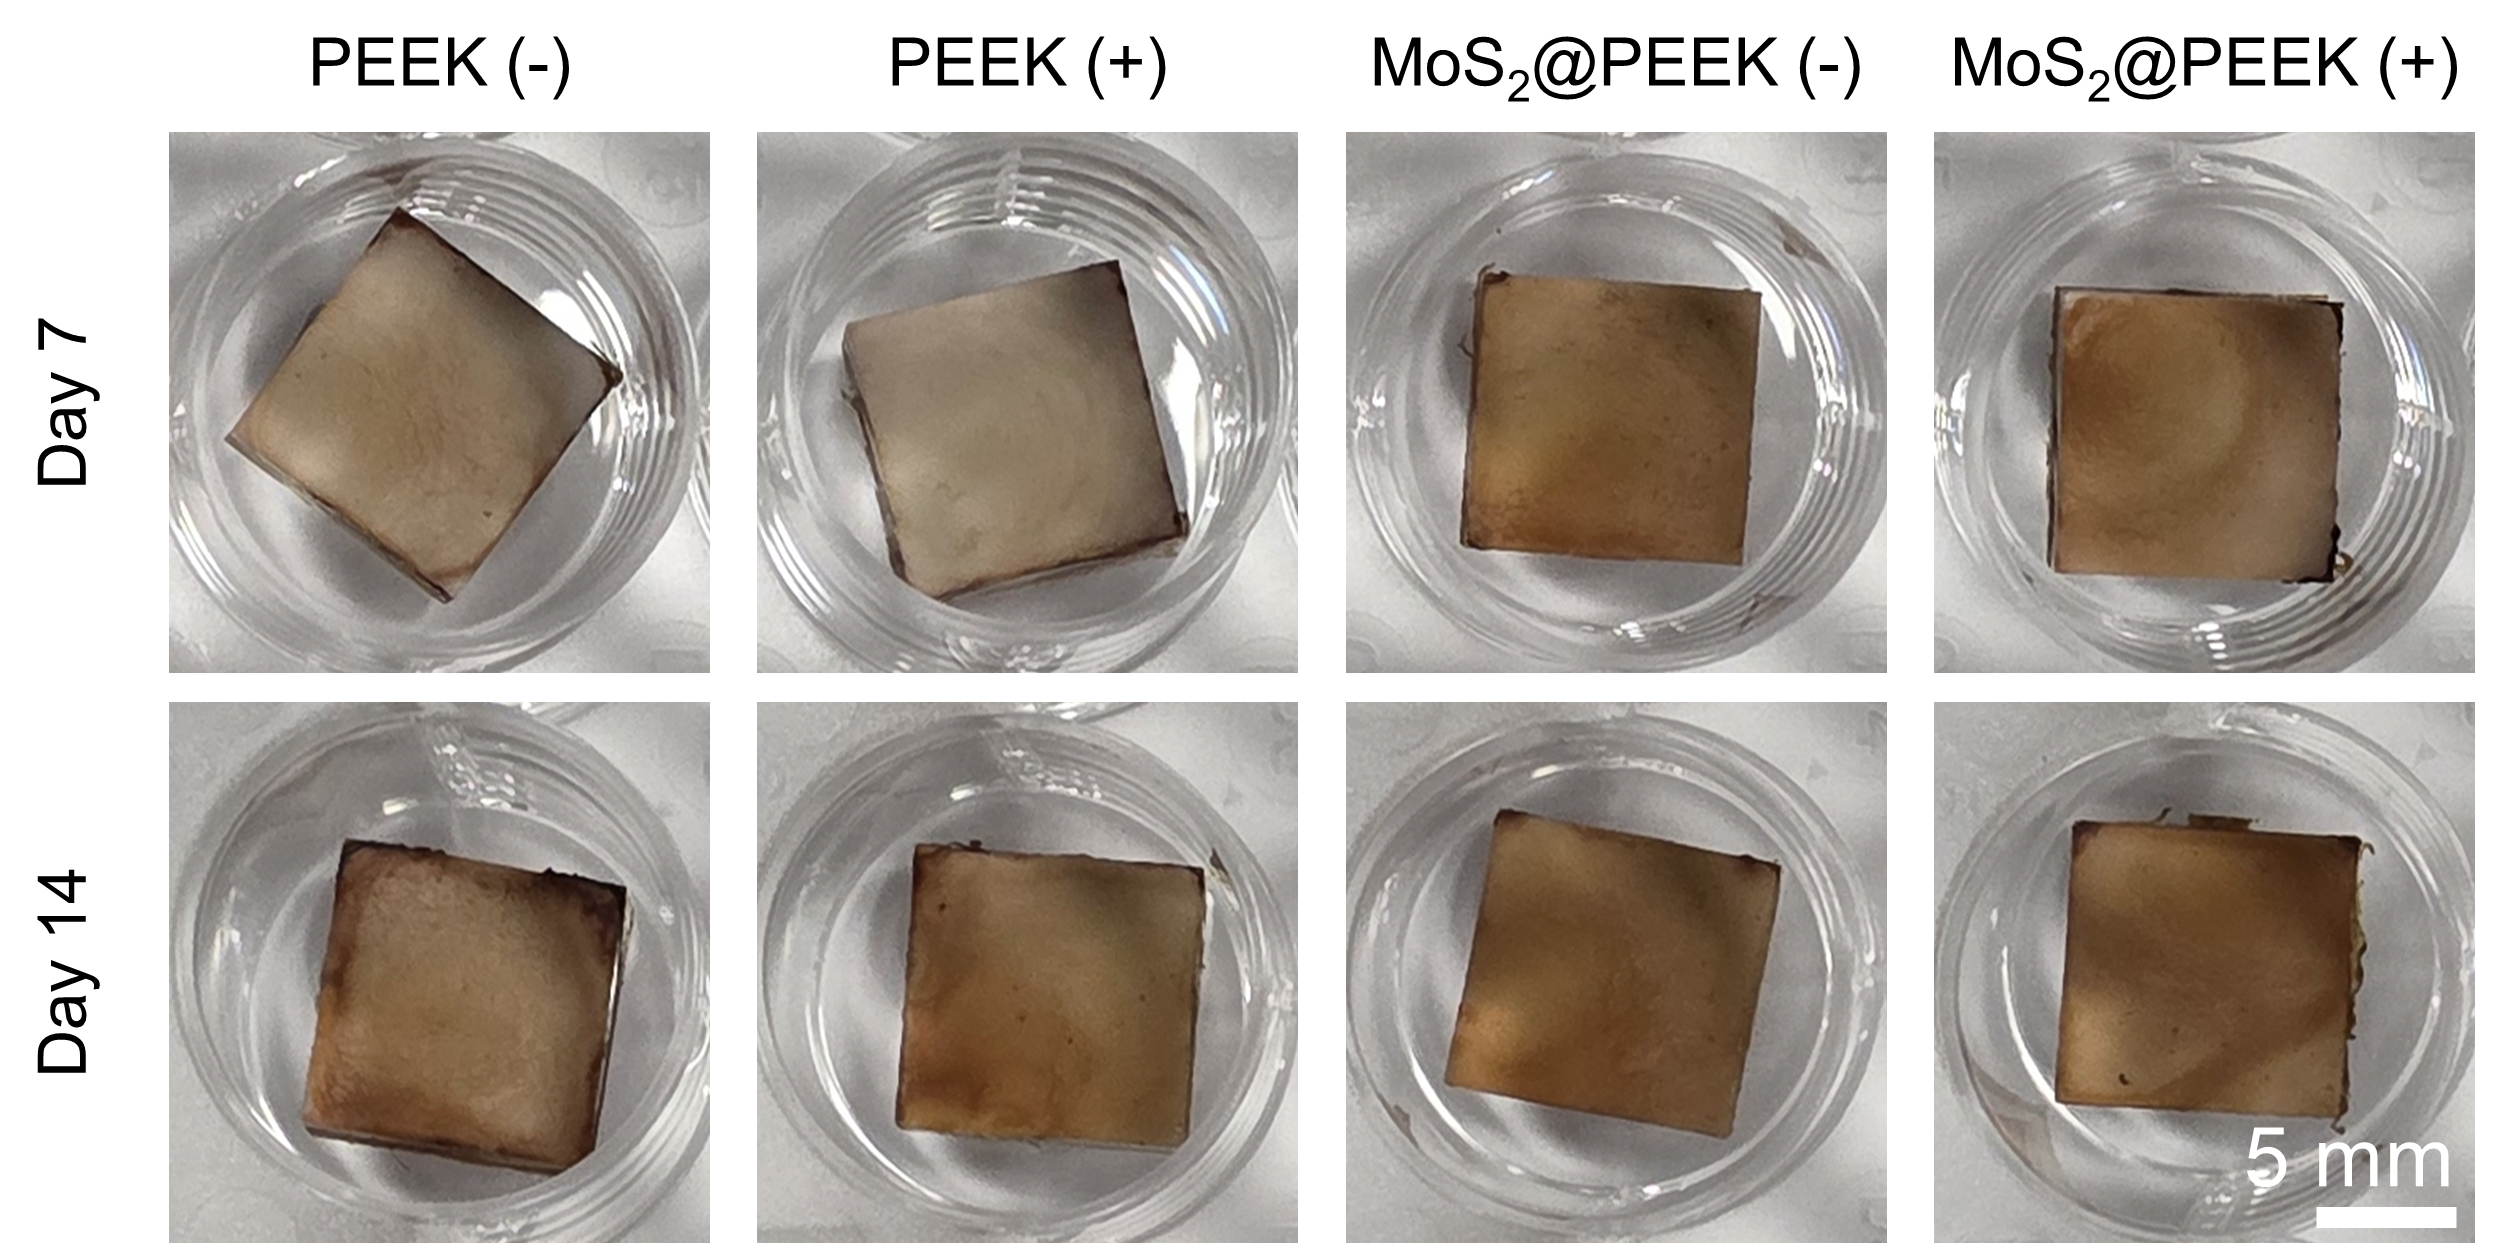


**Fig. S20.** Representative optical images of ARS staining of 3D-printed PEEK and MoS2@PEEK scaffolds under NIR-induced hyperthermia after 7 and 14 days of culture.
